# Supplementary material for: Prediction of Probable Major Depressive Disorder in the Taiwan Biobank: An Integrated Machine Learning and Genome-Wide Analysis Approach
Source: MDPI journal article supplement (doi:10.3390/jpm11070597), 2021-06-24
Supplement: s1 [file s1]

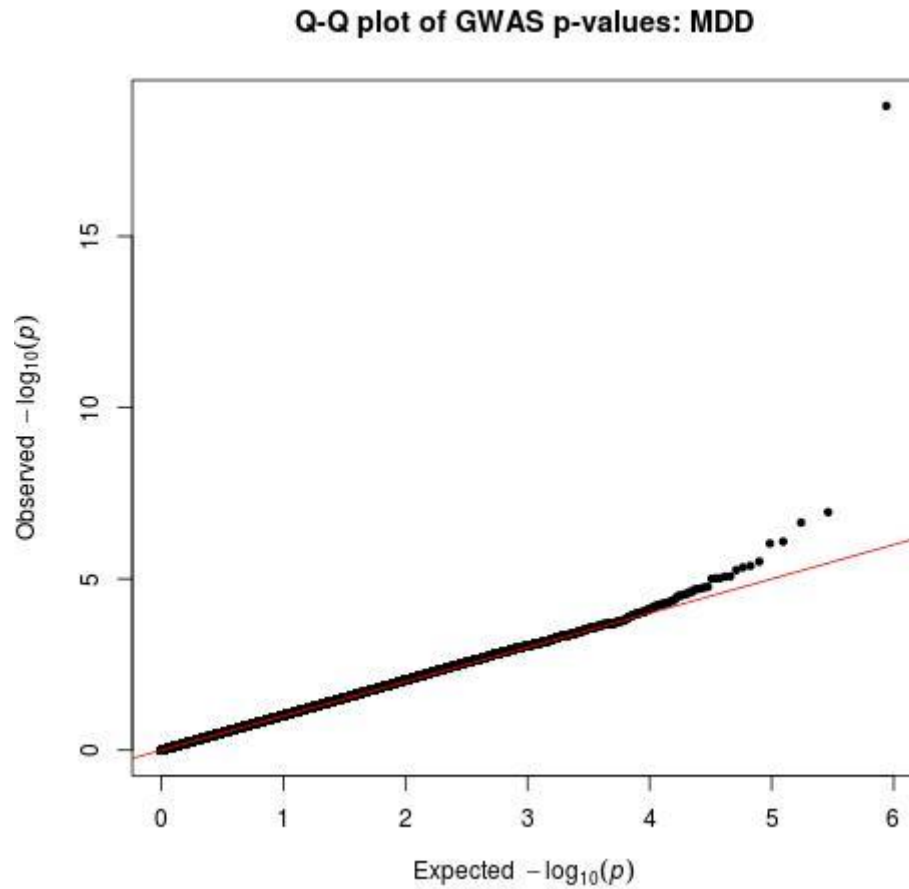

**Supplementary Fig. S1.** The quantile-quantile (Q-Q) plot of probable major depressive disorder (MDD) results. The plot illustrates expected and observed distributions of P-values from the genome-wide association study of probable MDD.
