# Supplementary material for: Prediction of Probable Major Depressive Disorder in the Taiwan Biobank: An Integrated Machine Learning and Genome-Wide Analysis Approach
Source: MDPI journal article supplement (doi:10.3390/jpm11070597), 2021-06-24
Supplement: s1 [file s1]

Table S6. The eQTL roles of the 17 eQTL SNPs.

| CHR | Gene                       | SNP        | Tissue (for eQTL study)                                                                                                                                                                                                                                                                                                                                              | Reference (PMID for eQTL study) |
|-----|----------------------------|------------|----------------------------------------------------------------------------------------------------------------------------------------------------------------------------------------------------------------------------------------------------------------------------------------------------------------------------------------------------------------------|---------------------------------|
| 1   | <i>LINC00624-BCL9</i>      | rs11240075 | Lymphoblastoid EUR Exonlevel                                                                                                                                                                                                                                                                                                                                         | 24037378                        |
| 1   | <i>TOMM40L, MIR5187</i>    | rs3813628  | Muscle Skeletal, Skin Sun Exposed Lower Leg, Whole Blood                                                                                                                                                                                                                                                                                                             | 25954001, 24013639              |
| 1   | <i>NR1I3</i>               | rs2307424  | Muscle Skeletal , Whole Blood                                                                                                                                                                                                                                                                                                                                        | 25954001, 24013639              |
| 1   | <i>CEP350-QSOX1</i>        | rs12040314 | Testis, Whole Blood                                                                                                                                                                                                                                                                                                                                                  | 25954001, 24013639              |
| 3   | <i>LOC105377123</i>        | rs1443524  | Stomach                                                                                                                                                                                                                                                                                                                                                              | 25954001                        |
| 5   | <i>CTNND2-RNU6-679P</i>    | rs12516830 | Nerve Tibia, Thyroid                                                                                                                                                                                                                                                                                                                                                 | 25954001                        |
| 5   | <i>FBN2</i>                | rs11241959 | Adrenal Gland, Artery Tibial, Colon Sigmoid, Esophagus Muscularis, Lung, Thyroid, Whole Blood                                                                                                                                                                                                                                                                        | 25954001, 24013639              |
| 6   | <i>MCUR1</i>               | rs3734669  | Skin Sun Exposed Lower Leg, Thyroid, Lymphoblastoid EUR Exonlevel                                                                                                                                                                                                                                                                                                    | 25954001, 24037378              |
| 8   | <i>BIN3</i>                | rs6558174  | Whole Blood                                                                                                                                                                                                                                                                                                                                                          | 24013639                        |
| 12  | <i>RPH3A</i>               | rs4767012  | Muscle Skeletal, Whole Blood                                                                                                                                                                                                                                                                                                                                         | 25954001, 24013639              |
| 13  | <i>CYCSP33- PARP4</i>      | rs9511242  | Cells Transformed Fibroblasts, Esophagus Muscularis, Lymphoblastoid EUR Exonlevel                                                                                                                                                                                                                                                                                    | 25954001, 24037378              |
| 13  | <i>RAB20-NAXD</i>          | rs9559849  | Whole Blood                                                                                                                                                                                                                                                                                                                                                          | 24013639                        |
| 15  | <i>PWRN1</i>               | rs7403037  | Brain Caudate Basal Ganglia, Brain Putamen Basal Ganglia, Thyroid                                                                                                                                                                                                                                                                                                    | 25954001                        |
| 16  | <i>METRN</i>               | rs66649828 | Brain Cerebellar Hemisphere, Brain Cerebellum, Adipose Subcutaneous, Adipose Visceral Omentum, Artery Aorta, Artery Tibial, Cells Transformed fibroblasts, Colon Sigmoid, Colon Transverse, Esophagus Mucosa, Esophagus Muscularis, Heart Left Ventricle, Lung, Nerve Tibial, Skin Sun Exposed Lower Leg, Testis, Thyroid, Whole Blood, Lymphoblastoid EUR Exonlevel | 25954001, 24037378              |
| 16  | <i>LOC101928474</i>        | rs7188498  | Whole Blood                                                                                                                                                                                                                                                                                                                                                          | 24013639                        |
| 19  | <i>EEF1A1P7- LINC01531</i> | rs12978607 | Whole Blood                                                                                                                                                                                                                                                                                                                                                          | 24013639                        |
| 19  | <i>PTGIR</i>               | rs11083840 | Lymphoblastoid EUR Genelevel, Whole Blood                                                                                                                                                                                                                                                                                                                            | 24037378, 24013639              |

CHR = chromosome. eQTL = expression quantitative trait locus, PMID = PubMed ID.

The eQTL information is obtained using HaploReg (<http://compbio.mit.edu/HaploReg>).
