# Supplementary material for: Prediction of Probable Major Depressive Disorder in the Taiwan Biobank: An Integrated Machine Learning and Genome-Wide Analysis Approach
Source: MDPI journal article supplement (doi:10.3390/jpm11070597), 2021-06-24
Supplement: s1 [file s1]

Table S8. Nearby SNPs between the Taiwan Biobank and previous reports from the NHGRI-EBI GWAS Catalog.

| Taiwan Biobank |             |                         |            |            | GWAS Catalog |             |                            |           |            |              |
|----------------|-------------|-------------------------|------------|------------|--------------|-------------|----------------------------|-----------|------------|--------------|
| CHR            | POS         | Gene                    | SNP        | Region     | CHR          | POS         | Gene                       | SNP       | Region     | First Author |
| 5              | 11,975,620  | <i>CTNND2-RNU6-679P</i> | rs12516830 | intergenic | 5            | 10,806,645  | <i>DAP-CTNND2</i>          | rs6893200 | intergenic | Hall LS      |
|                |             |                         |            |            | 5            | 10,820,731  | <i>DAP-CTNND2</i>          | rs2964802 | intergenic | Hall LS      |
|                |             |                         |            |            | 5            | 10,820,731  | <i>DAP-CTNND2</i>          | rs2964802 | intergenic | Hall LS      |
| 13             | 110,591,389 | <i>RAB20-NAXD</i>       | rs9559849  | intergenic | 13           | 110,796,311 | <i>RPL21P107-LINC00567</i> | rs4438172 | intergenic | Hall LS      |

CHR = chromosome, POS = position.
