# Supplementary material for: Prediction of Probable Major Depressive Disorder in the Taiwan Biobank: An Integrated Machine Learning and Genome-Wide Analysis Approach
Source: MDPI journal article supplement (doi:10.3390/jpm11070597), 2021-06-24
Supplement: s1 [file s1]

Table S1. Odds ratio analysis with odds ratios after adjustment for covariates between MDD and rs193922209 in *FBNI* .

| CHR | Gene        | SNP         | A1 | A2 | Region   | MAF   | OR   | 95% CI          | P                      |
|-----|-------------|-------------|----|----|----------|-------|------|-----------------|------------------------|
| 15  | <i>FBNI</i> | rs193922209 | G  | C  | intronic | 0.040 | 3.06 | ( 2.40 – 3.90 ) | $1.57 \times 10^{-19}$ |

A1 = minor allele, A2 = major allele, CHR = chromosome, CI = confidence interval, MAF = minor allele frequency, MDD = major depressive disorder, OR = odds ratio.

Analysis was obtained after adjustment for covariates including age and gender.
