# Supplementary material for: Prediction of Probable Major Depressive Disorder in the Taiwan Biobank: An Integrated Machine Learning and Genome-Wide Analysis Approach
Source: MDPI journal article supplement (doi:10.3390/jpm11070597), 2021-06-24
Supplement: s1 [file s1]

Table S5. Genotyping results for 17 eQTL SNPs.

| CHR | Gene                       | SNP        | A1 | A2 | MAF   | Genotyping<br>call rate | P (HWE) |
|-----|----------------------------|------------|----|----|-------|-------------------------|---------|
| 1   | <i>LINC00624-BCL9</i>      | rs11240075 | T  | C  | 0.247 | 0.999                   | 0.166   |
| 1   | <i>TOMM40L, MIR5187</i>    | rs3813628  | A  | C  | 0.465 | 0.997                   | 0.626   |
| 1   | <i>NR1I3</i>               | rs2307424  | G  | A  | 0.476 | 0.996                   | 0.792   |
| 1   | <i>CEP350-QSOX1</i>        | rs12040314 | G  | A  | 0.247 | 0.998                   | 0.290   |
| 3   | <i>LOC105377123</i>        | rs1443524  | G  | A  | 0.326 | 0.997                   | 0.334   |
| 5   | <i>CTNND2-RNU6-679P</i>    | rs12516830 | T  | C  | 0.250 | 0.998                   | 0.187   |
| 5   | <i>FBN2</i>                | rs11241959 | G  | A  | 0.180 | 0.998                   | 0.182   |
| 6   | <i>MCUR1</i>               | rs3734669  | T  | G  | 0.453 | 0.998                   | 0.514   |
| 8   | <i>BIN3</i>                | rs6558174  | A  | G  | 0.270 | 0.995                   | 0.124   |
| 12  | <i>RPH3A</i>               | rs4767012  | G  | A  | 0.275 | 0.999                   | 0.494   |
| 13  | <i>CYCSP33- PARP4</i>      | rs9511242  | A  | G  | 0.349 | 0.997                   | 0.842   |
| 13  | <i>RAB20-NAXD</i>          | rs9559849  | A  | G  | 0.470 | 0.997                   | 0.670   |
| 15  | <i>PWRN1</i>               | rs7403037  | G  | T  | 0.160 | 0.999                   | 0.033   |
| 16  | <i>METRNL</i>              | rs66649828 | A  | G  | 0.405 | 0.997                   | 0.933   |
| 16  | <i>LOC101928474</i>        | rs7188498  | A  | G  | 0.183 | 0.999                   | 0.028   |
| 19  | <i>EEF1A1P7- LINC01531</i> | rs12978607 | A  | C  | 0.490 | 0.998                   | 0.455   |
| 19  | <i>PTGIR</i>               | rs11083840 | G  | T  | 0.416 | 0.998                   | 0.678   |

A1 = minor allele, A2 = major allele, Chr = chromosome, HWE = Hardy–Weinberg equilibrium, MAF = minor allele frequency.
