# Supplementary material for: Prediction of Probable Major Depressive Disorder in the Taiwan Biobank: An Integrated Machine Learning and Genome-Wide Analysis Approach
Source: MDPI journal article supplement (doi:10.3390/jpm11070597), 2021-06-24
Supplement: s1 [file s1]

Table S4. Genotyping results for rs114542799 in *ALDH1L1* .

| CHR | Gene           | SNP         | A1 | A2 | MAF   | Genotyping<br>call rate | P (HWE) |
|-----|----------------|-------------|----|----|-------|-------------------------|---------|
| 3   | <i>ALDH1L1</i> | rs114542799 | A  | G  | 0.011 | 0.999                   | 1.00    |

A1 = minor allele, A2 = major allele, Chr = chromosome, HWE = Hardy–Weinberg equilibrium, MAF = minor allele frequency.
