# Supplementary material for: Prediction of Probable Major Depressive Disorder in the Taiwan Biobank: An Integrated Machine Learning and Genome-Wide Analysis Approach
Source: MDPI journal article supplement (doi:10.3390/jpm11070597), 2021-06-24
Supplement: s1 [file s1]

Table S3. Odds ratio analysis with odds ratios after adjustment for covariates between female MDD and rs114542799 in *ALDH1L1*.

| CHR | Gene           | SNP         | A1 | A2 | Region   | MAF   | OR   | 95% CI          | P                     |
|-----|----------------|-------------|----|----|----------|-------|------|-----------------|-----------------------|
| 3   | <i>ALDH1L1</i> | rs114542799 | A  | G  | intronic | 0.011 | 0.40 | ( 0.29 – 0.56 ) | $2.95 \times 10^{-8}$ |

A1 = minor allele, A2 = major allele, CHR = chromosome, CI = confidence interval, MAF = minor allele frequency, MDD = major depressive disorder, OR = odds ratio.

Analysis was obtained after adjustment for covariates including age.
