# Supplementary material for: Prediction of Probable Major Depressive Disorder in the Taiwan Biobank: An Integrated Machine Learning and Genome-Wide Analysis Approach
Source: MDPI journal article supplement (doi:10.3390/jpm11070597), 2021-06-24
Supplement: s1 [file s1]

Table S2. Genotyping results for rs193922209 in *FBNI* .

| CHR |             | Gene | SNP         | A1 | A2 | MAF   | Genotyping<br>call rate | P (HWE)               |
|-----|-------------|------|-------------|----|----|-------|-------------------------|-----------------------|
| 15  | <i>FBNI</i> |      | rs193922209 | G  | C  | 0.040 | 0.998                   | $3.65 \times 10^{-6}$ |

A1 = minor allele, A2 = major allele, Chr = chromosome, HWE = Hardy–Weinberg equilibrium, MAF = minor allele frequency.
