# Supplementary material for: Prediction of Probable Major Depressive Disorder in the Taiwan Biobank: An Integrated Machine Learning and Genome-Wide Analysis Approach
Source: MDPI journal article supplement (doi:10.3390/jpm11070597), 2021-06-24
Supplement: s1 [file s1]

Table S7. Summary of SNPs associated with major depressive disorder in previous reports from the NHGRI-EBI GWAS Catalog.

| Chr | Gene                           | SNP         | Risk Allele Frequency | Beta | 95% CI                        | P                      | First Author         |
|-----|--------------------------------|-------------|-----------------------|------|-------------------------------|------------------------|----------------------|
| 1   | <i>LINC01128</i>               | rs2977608   | 0.259                 | 1.07 | [1.04–1.1]                    | $8.00 \times 10^{-6}$  | Coleman JRI          |
| 1   | <i>LINC02782 - AL139823.1</i>  | rs912988    | 0.363                 | 0.18 | [0.1–0.26] unit increase      | $6.00 \times 10^{-6}$  | GENDEP Investigators |
| 1   | <i>CAMTA1</i>                  | rs7512599   | 0.708                 | 0.00 | [0.002–0.0044] unit increase  | $5.00 \times 10^{-7}$  | Howard DM            |
| 1   | <i>RERE</i>                    | rs301795    | NR                    | 5.77 | z score decrease              | $8.00 \times 10^{-9}$  | Nagel M              |
| 1   | <i>RERE</i>                    | rs301806    | 0.552                 | 0.03 | [0.015–0.039] unit decrease   | $2.00 \times 10^{-9}$  | Hyde CL              |
| 1   | <i>RERE-AS1, RERE</i>          | rs301807    | NR                    | 6.41 | z score increase              | $1.00 \times 10^{-10}$ | Nagel M              |
| 1   | <i>RERE, RERE-AS1</i>          | rs301799    | 0.431                 | 1.03 | [1.02–1.03]                   | $4.00 \times 10^{-31}$ | Howard DM            |
| 1   | <i>RERE</i>                    | rs159963    | 0.440                 | 1.03 | [1.02–1.04]                   | $3.00 \times 10^{-8}$  | Wray NR              |
| 1   | <i>RERE</i>                    | rs6695867   | NR                    | 5.86 | z score decrease              | $5.00 \times 10^{-9}$  | Nagel M              |
| 1   | <i>KLHDC7A - DYNLLIP3</i>      | rs4501813   | 0.940                 | 1.07 | [1.04–1.1]                    | $8.00 \times 10^{-6}$  | Coleman JRI          |
| 1   | <i>AL391650.2 - TRIM63</i>     | rs114098943 | 0.958                 | 1.07 | [1.04–1.1]                    | $4.00 \times 10^{-6}$  | Coleman JRI          |
| 1   | <i>AL590434.1 - ZMYM4</i>      | rs111796550 | 0.037                 | 1.07 | [1.04–1.1]                    | $8.00 \times 10^{-6}$  | Coleman JRI          |
| 1   | <i>FTLP18 - AL596257.1</i>     | rs218987    | 0.305                 | 0.01 | [0.0047–0.0101] unit increase | $1.00 \times 10^{-7}$  | Howard DM            |
| 1   | <i>AL596257.1 - AC117945.2</i> | rs1002656   | 0.297                 | 1.02 | [1.02–1.03]                   | $5.00 \times 10^{-19}$ | Howard DM            |
| 1   | <i>AL596257.1 - AC117945.2</i> | rs4653218   | 0.579                 | 0.01 | [0.0039–0.0087] unit decrease | $1.00 \times 10^{-7}$  | Howard DM            |
| 1   | <i>AL353604.1</i>              | rs1466887   | 0.449                 | 1.01 | [1.01–1.02]                   | $1.00 \times 10^{-8}$  | Howard DM            |
| 1   | <i>SKINT1L</i>                 | rs41287894  | NR                    | 0.45 | [0.25–0.65] unit increase     | $3.00 \times 10^{-6}$  | Hall LS              |
| 1   | <i>ELAVL4</i>                  | rs11579246  | 0.907                 | 1.03 | [1.025–1.04]                  | $9.00 \times 10^{-18}$ | Howard DM            |
| 1   | <i>NRDC</i>                    | rs1890946   | 0.533                 | 1.02 | [1.02–1.02]                   | $9.00 \times 10^{-19}$ | Howard DM            |
| 1   | <i>SGIP1</i>                   | rs10127497  | 0.138                 | 0.01 | [0.0064–0.013] unit increase  | $1.00 \times 10^{-8}$  | Howard DM            |
| 1   | <i>SGIP1</i>                   | rs10789214  | 0.566                 | 1.01 | [1.009–1.018]                 | $4.00 \times 10^{-10}$ | Howard DM            |
| 1   | <i>SGIP1</i>                   | rs6679379   | 0.288                 | 0.01 | [0.0047–0.0097] unit increase | $3.00 \times 10^{-8}$  | Howard DM            |
| 1   | <i>AL513166.1</i>              | rs2568958   | 0.616                 | 1.03 | [1.03–1.039]                  | $4.00 \times 10^{-52}$ | Howard DM            |
| 1   | <i>AL513166.1</i>              | rs11209948  | 0.639                 | 0.04 | [0.024–0.047] unit increase   | $8.00 \times 10^{-11}$ | Hyde CL              |
| 1   | <i>AL513166.1</i>              | rs1432639   | 0.630                 | 1.04 | [1.03–1.05]                   | $5.00 \times 10^{-15}$ | Wray NR              |
| 1   | <i>AL513166.1</i>              | rs6687024   | 0.623                 | 1.03 | [NR]                          | $4.00 \times 10^{-8}$  | Li X                 |
| 1   | <i>AL513166.1</i>              | rs6699744   | 0.612                 | 1.04 | [1.03–1.05]                   | $7.00 \times 10^{-14}$ | Cai N                |
| 1   | <i>AL513166.1</i>              | rs6699744   | 0.612                 | 0.01 | [0.0065–0.0113] unit increase | $2.00 \times 10^{-13}$ | Howard DM            |
| 1   | <i>AL513166.1</i>              | rs10789340  | 0.624                 | 0.01 | [0.0062–0.011] unit increase  | $2.00 \times 10^{-12}$ | Howard DM            |
| 1   | <i>LINC02797, AL583808.1</i>   | rs2422320   | 0.430                 |      |                               | $2.00 \times 10^{-11}$ | Amare AT             |
| 1   | <i>AL583808.1, LINC02797</i>   | rs2422321   | 0.441                 | 0.03 | [0.019–0.043] unit increase   | $3.00 \times 10^{-8}$  | Hyde CL              |
| 1   | <i>AL583808.1, LINC02797</i>   | rs12129942  | 0.515                 | 0.01 | [0.0037–0.0085] unit increase | $2.00 \times 10^{-7}$  | Howard DM            |
| 1   | <i>AL732618.1 - KRT8P21</i>    | rs11210111  | 0.462                 | 0.01 | [0.004–0.0088] unit decrease  | $5.00 \times 10^{-8}$  | Howard DM            |
| 1   | <i>RN7SKP19 - LINC01360</i>    | rs6424532   | 0.486                 | 0.01 | [0.0041–0.0089] unit increase | $4.00 \times 10^{-8}$  | Howard DM            |
| 1   | <i>RN7SKP19 - LINC01360</i>    | rs10890020  | 0.484                 | 1.03 | [1.02–1.03]                   | $3.00 \times 10^{-34}$ | Howard DM            |
| 1   | <i>RN7SKP19 - LINC01360</i>    | rs12129573  | 0.370                 | 1.04 | [1.03–1.05]                   | $4.00 \times 10^{-12}$ | Wray NR              |
| 1   | <i>LINC01360 - LINC02238</i>   | rs10890045  | 0.704                 | 0.01 | [0.0039–0.0089] unit decrease | $7.00 \times 10^{-7}$  | Howard DM            |
| 1   | <i>HMGB1P18 - AL606519.1</i>   | rs12065553  | 0.280                 | 0.03 | [0.017–0.045] unit increase   | $1.00 \times 10^{-8}$  | Hyde CL              |
| 1   | <i>HMGB1P18 - AL606519.1</i>   | rs12073845  | NR                    | 5.52 | z score decrease              | $3.00 \times 10^{-8}$  | Nagel M              |
| 1   | <i>HMGB1P18 - AL606519.1</i>   | rs2389016   | 0.280                 | 1.03 | [1.02–1.04]                   | $1.00 \times 10^{-8}$  | Wray NR              |
| 1   | <i>HMGB1P18 - AL606519.1</i>   | rs113188507 | 0.284                 | 1.02 | [1.019–1.029]                 | $3.00 \times 10^{-21}$ | Howard DM            |
| 1   | <i>AC098656.1 - AL627316.1</i> | rs4261101   | 0.630                 | 1.03 | [1.02–1.04]                   | $1.00 \times 10^{-8}$  | Wray NR              |
| 1   | <i>AC098656.1 - AL627316.1</i> | rs4356032   | 0.375                 | 0.03 | [0.017–0.041] unit decrease   | $3.00 \times 10^{-6}$  | Hyde CL              |
| 1   | <i>BCAR3</i>                   | rs62001028  | NR                    |      |                               | $5.00 \times 10^{-7}$  | Wong ML              |
| 1   | <i>AC114485.1</i>              | rs116071213 | 0.040                 | 1.07 | [1.04–1.1]                    | $4.00 \times 10^{-6}$  | Coleman JRI          |
| 1   | <i>AKNAD1, CLCC1</i>           | rs114508355 | NR                    | 0.46 | [0.26–0.66] unit decrease     | $9.00 \times 10^{-6}$  | Hall LS              |
| 1   | <i>ATXN7L2</i>                 | rs12049330  | 0.140                 | 1.44 |                               | $6.00 \times 10^{-6}$  | Shi J                |
| 1   | <i>GNAI3</i>                   | rs6537837   | 0.170                 | 1.43 |                               | $1.00 \times 10^{-6}$  | Shi J                |
| 1   | <i>SELENBP1 - PSMB4</i>        | rs4971040   | 0.841                 | 0.01 | [0.0053–0.0115] unit increase | $2.00 \times 10^{-7}$  | Howard DM            |
| 1   | <i>PKLR</i>                    | rs115736167 | 0.020                 | 0.46 | [0.28–0.64] unit decrease     | $2.00 \times 10^{-7}$  | Hall LS              |
| 1   | <i>AL135926.1</i>              | rs1765516   | 0.543                 | 0.01 | [0.0035–0.0083] unit decrease | $5.00 \times 10^{-7}$  | Howard DM            |
| 1   | <i>RPS29P5 - COP1</i>          | rs10913112  | 0.623                 | 1.02 | [1.02–1.03]                   | $2.00 \times 10^{-20}$ | Howard DM            |
| 1   | <i>ASTN1</i>                   | rs7548151   | 0.084                 | 0.01 | [0.0084–0.0166] unit increase | $4.00 \times 10^{-9}$  | Howard DM            |
| 1   | <i>ASTN1</i>                   | rs6697602   | 0.083                 | 1.06 | [1.04–1.07]                   | $6.00 \times 10^{-9}$  | Cai N                |
| 1   | <i>AL136114.1, LINC01645</i>   | rs736840    | 0.095                 | 0.05 | [0.03–0.069] unit increase    | $8.00 \times 10^{-8}$  | Hyde CL              |
| 1   | <i>AL136114.1</i>              | rs72710803  | 0.088                 | 1.02 | [1.02–1.03]                   | $1.00 \times 10^{-10}$ | Howard DM            |
| 1   | <i>AL136114.1</i>              | rs568799986 | 0.087                 | 0.01 | [0.0068–0.015] unit increase  | $2.00 \times 10^{-7}$  | Howard DM            |
| 1   | <i>CACNA1E</i>                 | rs169235    | 0.247                 | 1.02 | [1.01–1.02]                   | $2.00 \times 10^{-11}$ | Howard DM            |
| 1   | <i>ERVMEK61-1</i>              | rs1496089   | 0.736                 | 1.07 | [1.04–1.1]                    | $9.00 \times 10^{-6}$  | Coleman JRI          |
| 1   | <i>AL359976.1 - BRINP3</i>     | rs1935881   | 0.643                 | 0.03 | [0.017–0.04] unit decrease    | $1.00 \times 10^{-6}$  | Hyde CL              |
| 1   | <i>AL136456.1</i>              | rs606149    | 0.460                 | 1.25 | [NR]                          | $3.00 \times 10^{-6}$  | Lewis CM             |
| 1   | <i>CRB1</i>                    | rs2759663   | 0.219                 | 0.01 | [0.0048–0.0102] unit decrease | $1.00 \times 10^{-7}$  | Howard DM            |
| 1   | <i>DENND1B</i>                 | rs12118513  | 0.215                 | 0.01 | [0.0049–0.0103] unit decrease | $1.00 \times 10^{-7}$  | Howard DM            |
| 1   | <i>DENND1B</i>                 | rs16841842  | 0.783                 | 0.03 | [0.018–0.046] unit increase   | $5.00 \times 10^{-7}$  | Hyde CL              |
| 1   | <i>DENND1B</i>                 | rs17641524  | 0.209                 | 0.01 | [0.0048–0.0102] unit decrease | $2.00 \times 10^{-7}$  | Howard DM            |
| 1   | <i>DENND1B</i>                 | rs17641524  | 0.791                 | 1.02 | [1.02–1.03]                   | $8.00 \times 10^{-20}$ | Howard DM            |

| Chr | Gene                            | SNP         | Risk Allele Frequency | Beta | 95% CI                        | P                      | First Author         |
|-----|---------------------------------|-------------|-----------------------|------|-------------------------------|------------------------|----------------------|
| 1   | <i>DENND1B - C1orf53</i>        | rs9427672   | 0.760                 | 1.03 | [1.02–1.04]                   | $3.00 \times 10^{-8}$  | Wray NR              |
| 1   | <i>LPGAT1</i>                   | rs7526682   | 0.130                 | 5.54 | z score increase              | $3.00 \times 10^{-8}$  | Peterson RE          |
| 1   | <i>ESRRG</i>                    | rs2377360   | 0.263                 | 1.60 | [1.39–1.81]                   | $9.00 \times 10^{-6}$  | GENDEP Investigators |
| 1   | <i>NVL - CNIH4</i>              | rs11579964  | 0.840                 | 1.19 | [NR]                          | $4.00 \times 10^{-6}$  | Wray NR              |
| 1   | <i>STUM - ITPKB</i>             | rs11577545  | 0.210                 | 5.54 | z score increase              | $3.00 \times 10^{-8}$  | Peterson RE          |
| 1   | <i>BTF3P9 - AL451054.2</i>      | rs12410462  | 0.122                 | 1.26 | [1.16–1.36]                   | $4.00 \times 10^{-7}$  | GENDEP Investigators |
| 1   | <i>AL353052.1 - BX323014.1</i>  | rs6666516   | 0.492                 | 1.07 | [1.04–1.1]                    | $6.00 \times 10^{-6}$  | Coleman JRI          |
| 1   | <i>AL359764.3, AL359764.2</i>   | rs4660091   | 0.662                 | 0.03 | [0.017–0.04] unit decrease    | $3.00 \times 10^{-6}$  | Hyde CL              |
| 1   | <i>OR2T12</i>                   | rs41310573  | NR                    |      |                               | $4.00 \times 10^{-20}$ | Wong ML              |
| 2   | <i>MIR7515HG - LINC00487</i>    | rs1841556   | 0.635                 | 1.07 | [1.04–1.1]                    | $9.00 \times 10^{-6}$  | Coleman JRI          |
| 2   | <i>AC073062.1 - LINC00276</i>   | rs144356690 | 0.008                 | 1.07 | [1.04–1.1]                    | $5.00 \times 10^{-6}$  | Coleman JRI          |
| 2   | <i>NBAS</i>                     | rs10929355  | 0.456                 | 0.01 | [0.005–0.01] unit decrease    | $6.00 \times 10^{-9}$  | Howard DM            |
| 2   | <i>LAPTM4A-DT - AC098828.1</i>  | rs7565124   |                       |      |                               | $2.00 \times 10^{-6}$  | Aragam N             |
| 2   | <i>AC096570.1</i>               | rs11124319  | NR                    | 5.62 | z score decrease              | $2.00 \times 10^{-8}$  | Nagel M              |
| 2   | <i>AC096570.1</i>               | rs12052908  | 0.468                 | 1.02 | [1.02–1.03]                   | $4.00 \times 10^{-22}$ | Howard DM            |
| 2   | <i>AC018467.1</i>               | rs1449984   | 0.720                 | 0.15 | [NR] unit decrease            | $7.00 \times 10^{-6}$  | Terracciano A        |
| 2   | <i>TOGARAM2</i>                 | rs882632    | 0.290                 | 1.34 |                               | $2.00 \times 10^{-6}$  | Shi J                |
| 2   | <i>SLC8A1-AS1</i>               | rs13011737  | NR                    | 0.10 | [0.061–0.139] unit increase   | $1.00 \times 10^{-6}$  | Hall LS              |
| 2   | <i>RTN4</i>                     | rs3806572   | 0.292                 | 0.01 | [0.0043–0.0097] unit decrease | $8.00 \times 10^{-7}$  | Howard DM            |
| 2   | <i>RTN4 - CLHC1</i>             | rs7568777   | 0.186                 | 1.08 | [1.04–1.11]                   | $1.00 \times 10^{-6}$  | Coleman JRI          |
| 2   | <i>AC073875.1 - ACTG1P22</i>    | rs10175979  | 0.651                 | 0.01 | [0.0037–0.0085] unit increase | $8.00 \times 10^{-7}$  | Howard DM            |
| 2   | <i>ACTG1P22</i>                 | rs11682175  | 0.480                 | 1.03 | [1.02–1.04]                   | $5.00 \times 10^{-9}$  | Wray NR              |
| 2   | <i>ACTG1P22</i>                 | rs11688767  | NR                    | 5.53 | z score decrease              | $3.00 \times 10^{-8}$  | Nagel M              |
| 2   | <i>ACTG1P22 - VRK2</i>          | rs1568452   | 0.385                 | 1.03 | [1.025–1.034]                 | $3.00 \times 10^{-40}$ | Howard DM            |
| 2   | <i>ACTG1P22 - VRK2</i>          | rs2717046   | 0.367                 | 1.03 | [NR]                          | $1.00 \times 10^{-8}$  | Li X                 |
| 2   | <i>VRK2</i>                     | rs12713370  | NR                    | 6.04 | z score decrease              | $2.00 \times 10^{-9}$  | Nagel M              |
| 2   | <i>VRK2</i>                     | rs1518395   | 0.613                 | 0.03 | [0.02–0.044] unit increase    | $4.00 \times 10^{-12}$ | Hyde CL              |
| 2   | <i>VRK2</i>                     | rs848293    | NR                    | 5.64 | z score decrease              | $2.00 \times 10^{-8}$  | Nagel M              |
| 2   | <i>AC007422.1 - LINC01812</i>   | rs724568    | 0.360                 | 1.17 | [NR]                          | $5.00 \times 10^{-6}$  | Shyn SI              |
| 2   | <i>DNAH6</i>                    | rs12464040  | NR                    | 0.15 | [0.091–0.209] unit increase   | $2.00 \times 10^{-6}$  | Hall LS              |
| 2   | <i>RNF103-CHMP3, AC015971.1</i> | rs7585722   | 0.154                 | 1.02 | [1.02–1.03]                   | $5.00 \times 10^{-13}$ | Howard DM            |
| 2   | <i>SNRNP200, AC021188.1</i>     | rs4435501   | NR                    | 0.13 | [0.071–0.189] unit increase   | $4.00 \times 10^{-6}$  | Hall LS              |
| 2   | <i>AC018880.2 - AC013727.1</i>  | rs2945451   | 0.239                 | 0.01 | [0.0046–0.01] unit decrease   | $1.00 \times 10^{-7}$  | Howard DM            |
| 2   | <i>FHL2 - AC018802.1</i>        | rs111945524 | 0.045                 | 0.02 | [0.0096–0.0206] unit decrease | $9.00 \times 10^{-8}$  | Howard DM            |
| 2   | <i>CNTNAP5</i>                  | rs11123030  | 0.491                 | 1.03 | [1.02–1.04]                   | $1.00 \times 10^{-9}$  | Cai N                |
| 2   | <i>CNTNAP5</i>                  | rs11123030  | 0.510                 | 0.01 | [0.0036–0.0084] unit decrease | $3.00 \times 10^{-7}$  | Howard DM            |
| 2   | <i>LINC01876</i>                | rs1226412   | 0.792                 | 1.02 | [1.018–1.029]                 | $3.00 \times 10^{-18}$ | Howard DM            |
| 2   | <i>LINC01876</i>                | rs1226412   | 0.790                 | 1.03 | [1.02–1.04]                   | $2.00 \times 10^{-8}$  | Wray NR              |
| 2   | <i>LY75-CD302, LY75</i>         | rs2042772   | 0.255                 | 0.03 | [0.02–0.047] unit decrease    | $3.00 \times 10^{-6}$  | Hyde CL              |
| 2   | <i>RBMS1 - AC096656.1</i>       | rs4455170   | 0.284                 | 0.01 | [0.0041–0.0091] unit increase | $5.00 \times 10^{-7}$  | Howard DM            |
| 2   | <i>DNAJC10 - AC105396.1</i>     | rs288342    | NR                    | 0.09 | [0.051–0.129] unit decrease   | $7.00 \times 10^{-6}$  | Hall LS              |
| 2   | <i>CACYBPP2 - AC093639.3</i>    | rs62195769  | 0.107                 | 0.01 | [0.0032–0.0072] unit increase | $6.00 \times 10^{-8}$  | Howard DM            |
| 2   | <i>PCGEM1 - AC096647.1</i>      | rs10174573  | 0.570                 | 1.56 | [1.39–1.74]                   | $2.00 \times 10^{-6}$  | GENDEP Investigators |
| 2   | <i>DNAH7 - STK17B</i>           | rs139146062 | 0.024                 | 1.07 | [1.04–1.1]                    | $9.00 \times 10^{-6}$  | Coleman JRI          |
| 2   | <i>DNAH7 - STK17B</i>           | rs139146062 | 0.024                 | 1.15 | [1.09–1.2]                    | $7.00 \times 10^{-7}$  | Coleman JRI          |
| 2   | <i>SF3B1</i>                    | rs699319    | 0.319                 | 0.03 | [0.02–0.044] unit increase    | $2.00 \times 10^{-6}$  | Hyde CL              |
| 2   | <i>MYOSLID, AC007879.1</i>      | rs62188629  | 0.314                 | 1.02 | [1.012–1.022]                 | $5.00 \times 10^{-13}$ | Howard DM            |
| 2   | <i>ERBB4, MTND2P23</i>          | rs72948529  | 0.216                 | 0.01 | [0.0048–0.0102] unit increase | $2.00 \times 10^{-7}$  | Howard DM            |
| 2   | <i>SP140L</i>                   | rs4973321   | 0.013                 | 1.13 | [1.08–1.19]                   | $6.00 \times 10^{-6}$  | Coleman JRI          |
| 2   | <i>OR6B3 - OR9S24P</i>          | rs116200762 | 0.067                 | 1.13 | [1.07–1.18]                   | $9.00 \times 10^{-6}$  | Coleman JRI          |
| 2   | <i>MAB21L4</i>                  | rs78562453  | NR                    |      |                               | $6.00 \times 10^{-8}$  | Wong ML              |
| 3   | <i>GRM7</i>                     | rs507385    | NR                    | 0.13 | [0.071–0.189] unit decrease   | $9.00 \times 10^{-6}$  | Hall LS              |
| 3   | <i>GRM7</i>                     | rs9870680   | 0.440                 | 1.19 | [NR]                          | $1.00 \times 10^{-6}$  | Shyn SI              |
| 3   | <i>ATG7</i>                     | rs6442260   | NR                    | 5.46 | z score decrease              | $5.00 \times 10^{-8}$  | Nagel M              |
| 3   | <i>TBC1D5</i>                   | rs11708664  | 0.712                 | 1.15 | [1.09–1.21]                   | $1.00 \times 10^{-6}$  | Coleman JRI          |
| 3   | <i>KCNH8</i>                    | rs116215823 | 0.011                 | 1.07 | [1.04–1.1]                    | $7.00 \times 10^{-6}$  | Coleman JRI          |
| 3   | <i>RNU6-922P - RNU6-788P</i>    | rs77685443  | 0.036                 | 0.02 | [0.011–0.025] unit increase   | $7.00 \times 10^{-7}$  | Howard DM            |
| 3   | <i>THR8</i>                     | rs138272922 | 0.011                 | 1.16 | [1.11–1.21]                   | $5.00 \times 10^{-8}$  | Coleman JRI          |
| 3   | <i>RBMS3, AC098650.1</i>        | rs1874256   | NR                    | 0.07 | [0.031–0.109] unit increase   | $9.00 \times 10^{-6}$  | Hall LS              |
| 3   | <i>RBMS3, AC098650.1</i>        | rs1874256   | NR                    | 0.10 | [0.061–0.139] unit increase   | $4.00 \times 10^{-6}$  | Hall LS              |
| 3   | <i>CRTAP</i>                    | rs4478037   | 0.080                 | 0.29 | [0.19–0.39] unit increase     | $2.00 \times 10^{-8}$  | Hall LS              |
| 3   | <i>XYLB - ACVR2B-AS1</i>        | rs73063271  | NR                    | 0.17 | [0.092–0.248] unit decrease   | $6.00 \times 10^{-6}$  | Hall LS              |
| 3   | <i>ZKSCAN7-AS1 - SOCS5P3</i>    | rs4346585   | 0.304                 | 1.02 | [1.01–1.02]                   | $5.00 \times 10^{-12}$ | Howard DM            |
| 3   | <i>KLHDC8B - C3orf84</i>        | rs13084037  | 0.226                 | 1.02 | [1.02–1.03]                   | $2.00 \times 10^{-17}$ | Howard DM            |
| 3   | <i>ERC2</i>                     | rs7635184   | 0.602                 | 0.01 | [0.0039–0.0087] unit decrease | $2.00 \times 10^{-7}$  | Howard DM            |
| 3   | <i>FHIT</i>                     | rs141954845 | 0.388                 | 1.02 | [1.014–1.022]                 | $1.00 \times 10^{-15}$ | Howard DM            |
| 3   | <i>FHIT - PTPRG</i>             | rs10514718  | 0.940                 | 2.12 |                               | $4.00 \times 10^{-6}$  | Shi J                |
| 3   | <i>PTPRG</i>                    | rs40493     | NR                    | 0.13 | [0.071–0.189] unit increase   | $4.00 \times 10^{-6}$  | Hall LS              |

| Chr | Gene                                 | SNP         | Risk Allele Frequency | Beta | 95% CI                        | P                      | First Author         |
|-----|--------------------------------------|-------------|-----------------------|------|-------------------------------|------------------------|----------------------|
| 3   | <i>SYNPR</i>                         | rs73108923  | NR                    | 0.30 | [0.16–0.44] unit decrease     | $6.00 \times 10^{-6}$  | Hall LS              |
| 3   | <i>ROBO2</i>                         | rs935526    | NR                    | 5.45 | z score decrease              | $5.00 \times 10^{-8}$  | Nagel M              |
| 3   | <i>ROBO2</i>                         | rs775766    | NR                    | 5.66 | z score increase              | $2.00 \times 10^{-8}$  | Nagel M              |
| 3   | <i>MRPS17P3 - ROBO1</i>              | rs73117594  | NR                    | 5.66 | z score increase              | $2.00 \times 10^{-8}$  | Nagel M              |
| 3   | <i>AC091212.1</i>                    | rs1481631   | NR                    |      |                               | $2.00 \times 10^{-6}$  | Liu Y                |
| 3   | <i>RNU6-461P - RNU1-43P</i>          | rs1304150   | 0.868                 | 0.01 | [0.0057–0.0131] unit increase | $9.00 \times 10^{-7}$  | Howard DM            |
| 3   | <i>ZNF80 - TIGIT</i>                 | rs143445914 | 0.972                 | 1.07 | [1.04–1.1]                    | $8.00 \times 10^{-6}$  | Coleman JRI          |
| 3   | <i>AC092691.3, AC092691.1</i>        | rs6783233   | 0.283                 | 1.02 | [1.013–1.023]                 | $1.00 \times 10^{-13}$ | Howard DM            |
| 3   | <i>AC092691.1</i>                    | rs66511648  | 0.284                 | 1.03 | [1.02–1.04]                   | $2.00 \times 10^{-8}$  | Cai N                |
| 3   | <i>AC092691.1</i>                    | rs66511648  | 0.286                 | 0.01 | [0.0045–0.0095] unit increase | $1.00 \times 10^{-7}$  | Howard DM            |
| 3   | <i>PARP15</i>                        | rs2173763   | NR                    |      |                               | $6.00 \times 10^{-6}$  | Sullivan PF          |
| 3   | <i>RSRC1</i>                         | rs6441175   | NR                    | 6.04 | z score decrease              | $2.00 \times 10^{-9}$  | Nagel M              |
| 3   | <i>RSRC1</i>                         | rs1095626   | 0.420                 | 1.03 | [1.02–1.03]                   | $6.00 \times 10^{-39}$ | Howard DM            |
| 3   | <i>RSRC1</i>                         | rs1210358   | 0.615                 | 1.03 | [NR]                          | $9.00 \times 10^{-8}$  | Li X                 |
| 3   | <i>RSRC1</i>                         | rs7430565   | 0.420                 | 1.03 | [1.02–1.04]                   | $3.00 \times 10^{-9}$  | Wray NR              |
| 3   | <i>AC106707.1</i>                    | rs1656369   | 0.670                 | 0.03 | [0.023–0.046] unit increase   | $1.00 \times 10^{-8}$  | Hyde CL              |
| 3   | <i>AC106707.1</i>                    | rs1656369   | NR                    | 5.84 | z score decrease              | $5.00 \times 10^{-9}$  | Nagel M              |
| 3   | <i>IL12A-AS1</i>                     | rs6799788   | 0.248                 | 1.63 | [1.43–1.82]                   | $1.00 \times 10^{-6}$  | GENDEP Investigators |
| 3   | <i>AC069218.2 - AC069218.1</i>       | rs13074924  | 0.360                 | 1.18 | [NR]                          | $9.00 \times 10^{-6}$  | Lewis CM             |
| 3   | <i>LINC00578</i>                     | rs644695    | 0.880                 | 1.35 | [NR]                          | $5.00 \times 10^{-6}$  | Shyn SI              |
| 3   | <i>LINC01014, AC117457.1, KCNMB2</i> | rs2291479   | 0.400                 | 0.10 | [0.061–0.139] unit decrease   | $1.00 \times 10^{-6}$  | Hall LS              |
| 3   | <i>SOX2-OT</i>                       | rs139388380 | 0.019                 | 1.14 | [1.08–1.19]                   | $5.00 \times 10^{-6}$  | Coleman JRI          |
| 3   | <i>DVL3</i>                          | rs1969253   | NR                    |      |                               | $5.00 \times 10^{-6}$  | Sullivan PF          |
| 3   | <i>C3orf70 - EHHADH-AS1</i>          | rs7647854   | 0.160                 | 1.19 | [NR]                          | $5.00 \times 10^{-6}$  | Wray NR              |
| 3   | <i>C3orf70 - EHHADH-AS1</i>          | rs7647854   | 0.160                 | 1.16 | [1.11–1.21]                   | $5.00 \times 10^{-11}$ | Power RA             |
| 3   | <i>AC026320.3</i>                    | rs4585146   | 0.650                 | 1.16 | [1.11–1.22]                   | $6.00 \times 10^{-6}$  | GENDEP Investigators |
| 3   | <i>AC026320.3</i>                    | rs4585146   | 0.362                 | 0.22 | [0.14–0.31] unit decrease     | $3.00 \times 10^{-7}$  | GENDEP Investigators |
| 3   | <i>OPA1</i>                          | rs9838374   | 0.183                 | 0.04 | [0.022–0.053] unit increase   | $6.00 \times 10^{-8}$  | Hyde CL              |
| 3   | <i>LINC02038 - LINC02026</i>         | rs604222    | 0.192                 | 0.22 | [0.12–0.31] unit increase     | $7.00 \times 10^{-6}$  | GENDEP Investigators |
| 4   | <i>HTT</i>                           | rs7685686   | 0.575                 | 1.02 | [1.013–1.022]                 | $6.00 \times 10^{-15}$ | Howard DM            |
| 4   | <i>LINC02473 - AC006390.1</i>        | rs12500612  | 0.850                 | 1.77 | [1.51–2.02]                   | $7.00 \times 10^{-6}$  | GENDEP Investigators |
| 4   | <i>SLC30A9</i>                       | rs34215985  | 0.760                 | 1.04 | [1.03–1.05]                   | $3.00 \times 10^{-9}$  | Wray NR              |
| 4   | <i>SLC30A9 - BEND4</i>               | rs34937911  | 0.884                 | 1.03 | [1.018–1.032]                 | $5.00 \times 10^{-13}$ | Howard DM            |
| 4   | <i>GABRB1</i>                        | rs13127214  | NR                    | 0.19 | [0.11–0.27] unit increase     | $7.00 \times 10^{-6}$  | Hall LS              |
| 4   | <i>MTCO3P27 - MTCYBP16</i>           | rs78825642  | 0.870                 | 1.07 | [1.04–1.1]                    | $4.00 \times 10^{-6}$  | Coleman JRI          |
| 4   | <i>AC068721.1 - NPFFR2</i>           | rs116569570 | NR                    | 0.16 | [0.082–0.238] unit decrease   | $5.00 \times 10^{-6}$  | Hall LS              |
| 4   | <i>RASGEF1B</i>                      | rs1822818   | 0.870                 | 1.77 | [1.53–2.02]                   | $6.00 \times 10^{-6}$  | GENDEP Investigators |
| 4   | <i>AC073840.1</i>                    | rs9991694   | 0.767                 | 1.16 | [1.1–1.22]                    | $5.00 \times 10^{-7}$  | Coleman JRI          |
| 4   | <i>UNC5C</i>                         | rs6822806   | NR                    | 0.18 | [0.1–0.26] unit decrease      | $5.00 \times 10^{-6}$  | Hall LS              |
| 4   | <i>MRPS33P3 - RPF2P2</i>             | rs116233998 | NR                    | 0.47 | [0.27–0.67] unit decrease     | $7.00 \times 10^{-6}$  | Hall LS              |
| 4   | <i>KIAA1109</i>                      | rs77087420  | NR                    | 6.40 | z score increase              | $2.00 \times 10^{-10}$ | Nagel M              |
| 4   | <i>KIAA1109</i>                      | rs45510091  | 0.947                 | 1.05 | [1.037–1.057]                 | $8.00 \times 10^{-21}$ | Howard DM            |
| 4   | <i>AC133530.1 - AC097474.1</i>       | rs2125000   | 0.307                 | 1.43 | [1.27–1.58]                   | $3.00 \times 10^{-6}$  | GENDEP Investigators |
| 4   | <i>TECRP2 - LINC02516</i>            | rs6534441   | 0.333                 | 0.18 | [0.1–0.26] unit decrease      | $7.00 \times 10^{-6}$  | GENDEP Investigators |
| 4   | <i>HSPA4L</i>                        | rs187279821 | NR                    | 0.42 | [0.24–0.6] unit decrease      | $5.00 \times 10^{-6}$  | Hall LS              |
| 4   | <i>LINC02465 - LINC02479</i>         | rs6818069   | 0.253                 | 0.01 | [0.0042–0.0096] unit increase | $4.00 \times 10^{-7}$  | Howard DM            |
| 4   | <i>LINC02465 - LINC02479</i>         | rs35553410  | 0.254                 | 1.02 | [1.01–1.02]                   | $2.00 \times 10^{-10}$ | Howard DM            |
| 4   | <i>KRT18P54 - TARS2P1</i>            | rs11099341  | NR                    | 0.09 | [0.051–0.129] unit decrease   | $7.00 \times 10^{-6}$  | Hall LS              |
| 4   | <i>AC098859.2 - AC093766.1</i>       | rs4475190   | 0.268                 | 0.01 | [0.0043–0.0093] unit decrease | $5.00 \times 10^{-7}$  | Howard DM            |
| 4   | <i>PDGFC</i>                         | rs342318    | NR                    | 0.10 | [0.061–0.139] unit increase   | $6.00 \times 10^{-6}$  | Hall LS              |
| 4   | <i>LINC02477 - RPS14P7</i>           | rs115981586 | NR                    | 0.21 | [0.11–0.31] unit increase     | $8.00 \times 10^{-6}$  | Hall LS              |
| 4   | <i>FAT1</i>                          | rs56390503  | 0.110                 | 0.13 | [0.071–0.189] unit increase   | $9.00 \times 10^{-7}$  | Hall LS              |
| 4   | <i>LINC02374 - AC097652.1</i>        | rs4478239   | NR                    |      |                               | $5.00 \times 10^{-6}$  | Sullivan PF          |
| 5   | <i>AC012629.1 - CTNND2</i>           | rs6893200   | NR                    | 0.11 | [0.071–0.149] unit decrease   | $5.00 \times 10^{-6}$  | Hall LS              |
| 5   | <i>AC012629.1 - CTNND2</i>           | rs2964802   | 0.280                 | 0.09 | [0.051–0.129] unit increase   | $7.00 \times 10^{-7}$  | Hall LS              |
| 5   | <i>AC012629.1 - CTNND2</i>           | rs2964802   | NR                    | 0.10 | [0.061–0.139] unit increase   | $2.00 \times 10^{-6}$  | Hall LS              |
| 5   | <i>TRIO</i>                          | rs115054458 | NR                    |      |                               | $3.00 \times 10^{-7}$  | Wong ML              |
| 5   | <i>MYO10</i>                         | rs17651119  | 0.990                 | 3.18 | [2.77–3.59]                   | $2.00 \times 10^{-8}$  | GENDEP Investigators |
| 5   | <i>HSPD1P15 - CDH18</i>              | rs349475    | 0.290                 | 0.18 | [NR] unit increase            | $2.00 \times 10^{-6}$  | Terracciano A        |
| 5   | <i>CDH9</i>                          | rs1946473   | NR                    | 5.55 | z score decrease              | $3.00 \times 10^{-8}$  | Nagel M              |
| 5   | <i>PURPL - AC093300.1</i>            | rs12054895  | 0.275                 | 0.24 | [0.16–0.33] unit increase     | $3.00 \times 10^{-8}$  | GENDEP Investigators |
| 5   | <i>LINC02119</i>                     | rs270545    | 0.690                 | 1.37 |                               | $1.00 \times 10^{-6}$  | Shi J                |
| 5   | <i>RN7SKP157 - KIF2A</i>             | rs60157091  | 0.515                 | 1.02 | [1.016–1.025]                 | $6.00 \times 10^{-21}$ | Howard DM            |
| 5   | <i>AC025445.1 - AC008558.1</i>       | rs255428    | NR                    | 0.13 | [0.071–0.189] unit increase   | $3.00 \times 10^{-6}$  | Hall LS              |
| 5   | <i>AC093270.3 - AC093270.1</i>       | rs7713917   | 0.600                 | 1.33 | [1.19–1.49]                   | $1.00 \times 10^{-6}$  | Rietschel M          |
| 5   | <i>VCAN - HAPLN1</i>                 | rs310501    | 0.330                 | 1.16 | [NR]                          | $7.00 \times 10^{-6}$  | Lewis CM             |
| 5   | <i>LINC02144 - AC020930.1</i>        | rs1673101   | 0.331                 | 0.19 | [0.11–0.27] unit decrease     | $4.00 \times 10^{-6}$  | GENDEP Investigators |
| 5   | <i>AC114971.1 - TMEM161B</i>         | rs1133152   | 0.132                 | 1.05 | [NR]                          | $1.00 \times 10^{-7}$  | Li X                 |

| Chr | Gene                            | SNP         | Risk Allele Frequency | Beta | 95% CI                        | P                      | First Author         |
|-----|---------------------------------|-------------|-----------------------|------|-------------------------------|------------------------|----------------------|
| 5   | <i>TMEM161B</i>                 | rs3099439   | 0.471                 | 1.02 | [1.02–1.03]                   | $2.00 \times 10^{-21}$ | Howard DM            |
| 5   | <i>TMEM161B-AS1</i>             | rs10514299  | 0.241                 | 0.04 | [0.031–0.059] unit increase   | $1.00 \times 10^{-15}$ | Hyde CL              |
| 5   | <i>LINC00461</i>                | rs6882046   | NR                    | 5.66 | z score decrease              | $1.00 \times 10^{-8}$  | Nagel M              |
| 5   | <i>MEF2C-AS2, AC008525.1</i>    | rs2304607   | NR                    | 6.06 | z score decrease              | $1.00 \times 10^{-9}$  | Nagel M              |
| 5   | <i>MEF2C-AS2</i>                | rs454214    | 0.568                 | 0.03 | [0.022–0.045] unit decrease   | $1.00 \times 10^{-9}$  | Hyde CL              |
| 5   | <i>MEF2C-AS2</i>                | rs454214    | NR                    | 5.49 | z score decrease              | $4.00 \times 10^{-8}$  | Nagel M              |
| 5   | <i>FAM172A, POU5F2</i>          | rs10061069  | 0.779                 | 1.03 | [1.02–1.03]                   | $5.00 \times 10^{-22}$ | Howard DM            |
| 5   | <i>AC099520.1</i>               | rs2028526   | 0.349                 | 0.01 | [0.0038–0.0086] unit increase | $5.00 \times 10^{-7}$  | Howard DM            |
| 5   | <i>AC099520.1</i>               | rs30266     | 0.328                 | 1.04 | [1.03–1.05]                   | $4.00 \times 10^{-12}$ | Cai N                |
| 5   | <i>AC099520.1</i>               | rs30266     | 0.334                 | 1.08 | [1.05–1.11]                   | $2.00 \times 10^{-7}$  | Coleman JRI          |
| 5   | <i>AC099520.1</i>               | rs30266     | 0.330                 | 1.03 | [1.028–1.037]                 | $2.00 \times 10^{-45}$ | Howard DM            |
| 5   | <i>AC099520.1</i>               | rs40465     | 0.332                 | 0.01 | [0.0053–0.0103] unit increase | $4.00 \times 10^{-10}$ | Howard DM            |
| 5   | <i>AC099520.1</i>               | rs161645    | 0.340                 |      |                               | $8.00 \times 10^{-8}$  | Hek K                |
| 5   | <i>AC099520.1</i>               | rs323509    | 0.677                 | 0.01 | [0.0049–0.0099] unit decrease | $3.00 \times 10^{-9}$  | Howard DM            |
| 5   | <i>FER</i>                      | rs10070411  | 0.778                 | 1.08 | [1.05–1.11]                   | $7.00 \times 10^{-7}$  | Coleman JRI          |
| 5   | <i>FER</i>                      | rs17534846  | 0.656                 | 1.14 | [1.08–1.2]                    | $8.00 \times 10^{-6}$  | Coleman JRI          |
| 5   | <i>LINC02200 - APC</i>          | rs11743328  | NR                    | 0.10 | [0.061–0.139] unit decrease   | $7.00 \times 10^{-6}$  | Hall LS              |
| 5   | <i>AC025465.1</i>               | rs12513663  | 0.268                 | 1.18 | [1.11–1.26]                   | $2.00 \times 10^{-6}$  | GENDEP Investigators |
| 5   | <i>LINC02240</i>                | rs116755193 | 0.620                 | 1.03 | [1.02–1.04]                   | $7.00 \times 10^{-9}$  | Wray NR              |
| 5   | <i>AC112178.1 - AC109439.1</i>  | rs35514087  | 0.048                 | 1.09 | [1.05–1.12]                   | $2.00 \times 10^{-7}$  | Coleman JRI          |
| 5   | <i>CYSTM1, PFDN1</i>            | rs13186198  | 0.536                 | 1.07 | [1.04–1.1]                    | $9.00 \times 10^{-6}$  | Coleman JRI          |
| 5   | <i>PCDHA5</i>                   | rs3806843   | 0.449                 | 0.03 | [0.017–0.041] unit decrease   | $9.00 \times 10^{-8}$  | Hyde CL              |
| 5   | <i>PCDHA5</i>                   | rs3806843   | NR                    | 6.05 | z score decrease              | $1.00 \times 10^{-9}$  | Nagel M              |
| 5   | <i>AC005753.1 - PCDH1</i>       | rs166040    | 0.870                 | 1.61 | [1.41–1.8]                    | $5.00 \times 10^{-6}$  | GENDEP Investigators |
| 5   | <i>ARHGEF37 - AC022100.2</i>    | rs17710780  | 0.860                 | 1.66 | [1.45–1.88]                   | $4.00 \times 10^{-6}$  | GENDEP Investigators |
| 5   | <i>AC008691.1</i>               | rs10065906  | 0.332                 | 1.17 | [1.11–1.22]                   | $2.00 \times 10^{-6}$  | GENDEP Investigators |
| 5   | <i>AC008691.1</i>               | rs10065906  | 0.308                 | 1.47 | [1.33–1.61]                   | $5.00 \times 10^{-8}$  | GENDEP Investigators |
| 5   | <i>AC008691.1</i>               | rs10065906  | 0.362                 | 1.53 | [1.36–1.7]                    | $2.00 \times 10^{-6}$  | GENDEP Investigators |
| 5   | <i>AC109466.1</i>               | rs7714851   | 0.520                 |      |                               | $8.00 \times 10^{-16}$ | Amare AT             |
| 5   | <i>AC109466.1</i>               | rs4339373   | 0.510                 | 1.03 | [NR]                          | $2.00 \times 10^{-7}$  | Li X                 |
| 5   | <i>AC109466.1</i>               | rs4543289   | 0.480                 | 0.03 | [0.02–0.044] unit decrease    | $1.00 \times 10^{-8}$  | Hyde CL              |
| 5   | <i>AC109466.1</i>               | rs4543289   | NR                    | 5.50 | z score decrease              | $4.00 \times 10^{-8}$  | Nagel M              |
| 5   | <i>AC109466.1</i>               | rs4543289   | NR                    | 1.02 | [1.01–1.03]                   | $7.00 \times 10^{-6}$  | Cai N                |
| 5   | <i>AC109466.1</i>               | rs10035449  | 0.536                 | 0.01 | [0.0037–0.0085] unit increase | $2.00 \times 10^{-7}$  | Howard DM            |
| 5   | <i>AC109466.1</i>               | rs11135349  | 0.529                 | 1.03 | [1.02–1.03]                   | $2.00 \times 10^{-30}$ | Howard DM            |
| 5   | <i>AC109466.1</i>               | rs11135349  | 0.520                 | 1.03 | [1.02–1.04]                   | $1.00 \times 10^{-9}$  | Wray NR              |
| 5   | <i>AC109466.1</i>               | rs10476497  | 0.534                 | 1.07 | [1.04–1.1]                    | $5.00 \times 10^{-6}$  | Coleman JRI          |
| 5   | <i>LINC01938</i>                | rs564483817 | 0.376                 | 0.01 | [0.0038–0.0086] unit decrease | $3.00 \times 10^{-7}$  | Howard DM            |
| 5   | <i>TENM2</i>                    | rs2098651   | NR                    | 6.34 | z score increase              | $2.00 \times 10^{-10}$ | Nagel M              |
| 5   | <i>TENM2</i>                    | rs4869056   | 0.370                 | 1.03 | [1.02–1.04]                   | $7.00 \times 10^{-9}$  | Wray NR              |
| 5   | <i>TENM2</i>                    | rs62383381  | 0.164                 | 0.01 | [0.0047–0.0109] unit increase | $9.00 \times 10^{-7}$  | Howard DM            |
| 5   | <i>PANK3</i>                    | rs35693458  | 0.148                 | 1.14 | [1.08–1.19]                   | $8.00 \times 10^{-6}$  | Coleman JRI          |
| 5   | <i>MGAT4B, MGAT4B</i>           | rs272440    | 0.999                 | 0.48 | [0.27–0.69] unit decrease     | $6.00 \times 10^{-7}$  | Hyde CL              |
| 6   | <i>LY86-AS1, LY86</i>           | rs2326810   | 0.920                 | 1.41 | [NR]                          | $7.00 \times 10^{-6}$  | Shyn SI              |
| 6   | <i>OFCC1</i>                    | rs12210761  | 0.068                 | 2.45 | [2.06–2.83]                   | $6.00 \times 10^{-6}$  | GENDEP Investigators |
| 6   | <i>AL024498.2, TMEM14B, MAK</i> | rs114927772 | NR                    | 0.35 | [0.21–0.49] unit increase     | $3.00 \times 10^{-6}$  | Hall LS              |
| 6   | <i>GMPR</i>                     | rs10484358  | 0.083                 | 0.43 | [0.25–0.6] unit decrease      | $1.00 \times 10^{-6}$  | GENDEP Investigators |
| 6   | <i>AL133270.1 - AL139093.1</i>  | rs9466930   | 0.215                 | 1.50 | [1.32–1.68]                   | $4.00 \times 10^{-6}$  | GENDEP Investigators |
| 6   | <i>DCDC2</i>                    | rs12189861  | 0.105                 | 0.01 | [0.0058–0.0132] unit increase | $7.00 \times 10^{-7}$  | Howard DM            |
| 6   | <i>DCDC2</i>                    | rs12205083  | 0.104                 | 1.05 | [1.04–1.07]                   | $6.00 \times 10^{-10}$ | Cai N                |
| 6   | <i>SCGN - H2AC1</i>             | rs68006638  | 0.094                 | 0.01 | [0.0063–0.0141] unit decrease | $6.00 \times 10^{-7}$  | Howard DM            |
| 6   | <i>H2BC4</i>                    | rs144735131 | NR                    | 0.40 | [0.24–0.56] unit decrease     | $2.00 \times 10^{-6}$  | Hall LS              |
| 6   | <i>BTN3A2</i>                   | rs13218591  | NR                    | 5.61 | z score increase              | $2.00 \times 10^{-8}$  | Nagel M              |
| 6   | <i>BTN3A1</i>                   | rs75782365  | 0.890                 | 1.05 | [1.04–1.07]                   | $1.00 \times 10^{-9}$  | Cai N                |
| 6   | <i>BTN3A1</i>                   | rs75782365  | 0.105                 | 0.01 | [0.0075–0.0149] unit decrease | $6.00 \times 10^{-9}$  | Howard DM            |
| 6   | <i>BTN2A1</i>                   | rs3799380   | NR                    | 5.77 | z score increase              | $8.00 \times 10^{-9}$  | Nagel M              |
| 6   | <i>ABT1</i>                     | rs45527431  | 0.105                 | 0.01 | [0.0078–0.0152] unit decrease | $2.00 \times 10^{-9}$  | Howard DM            |
| 6   | <i>AL513548.1 - GUSBP2</i>      | rs35144506  | 0.118                 | 0.01 | [0.0077–0.0151] unit decrease | $5.00 \times 10^{-9}$  | Howard DM            |
| 6   | <i>LINC00240</i>                | rs66975207  | 0.889                 | 1.08 | NR                            | $1.00 \times 10^{-9}$  | Cai N                |
| 6   | <i>LINC00240</i>                | rs66975207  | 0.106                 | 0.01 | [0.0074–0.0148] unit decrease | $7.00 \times 10^{-9}$  | Howard DM            |
| 6   | <i>VN1R11P - RNU2-62P</i>       | rs55834529  | 0.106                 | 0.01 | [0.0077–0.0151] unit decrease | $3.00 \times 10^{-9}$  | Howard DM            |
| 6   | <i>MCFD2P1 - ZNF184</i>         | rs2064219   | NR                    | 6.15 | z score increase              | $8.00 \times 10^{-10}$ | Nagel M              |
| 6   | <i>MCFD2P1 - ZNF184</i>         | rs7772160   | 0.522                 | 1.04 | [1.03–1.05]                   | $3.00 \times 10^{-12}$ | Cai N                |
| 6   | <i>AL021918.5</i>               | rs7749305   | 0.121                 | 0.01 | [0.0084–0.0154] unit decrease | $4.00 \times 10^{-11}$ | Howard DM            |
| 6   | <i>RNU6-471P - AL031229.1</i>   | rs35715914  | 0.108                 | 0.01 | [0.0088–0.0162] unit decrease | $8.00 \times 10^{-11}$ | Howard DM            |
| 6   | <i>H2BC15</i>                   | rs200990    | NR                    | 6.26 | z score increase              | $4.00 \times 10^{-10}$ | Nagel M              |
| 6   | <i>H1-5 - H3C11</i>             | rs200949    | 0.874                 | 1.04 | [1.037–1.051]                 | $2.00 \times 10^{-37}$ | Howard DM            |
| 6   | <i>H4C13 - H3C12</i>            | rs483143    | 0.128                 | 0.01 | [0.0086–0.0156] unit decrease | $8.00 \times 10^{-12}$ | Howard DM            |

| Chr | Gene                    | SNP         | Risk Allele Frequency | Beta | 95% CI                        | P                      | First Author         |
|-----|-------------------------|-------------|-----------------------|------|-------------------------------|------------------------|----------------------|
| 6   | ZSCAN16-AS1, ZSCAN12P1  | rs13197574  | 0.110                 | 0.01 | [0.0091–0.0165] unit decrease | $1.00 \times 10^{-11}$ | Howard DM            |
| 6   | AL358933.1              | rs4713145   | NR                    | 1.03 | [1.02–1.04]                   | $2.00 \times 10^{-7}$  | Cai N                |
| 6   | AL358933.1              | rs4713145   | 0.756                 | 1.06 | NR                            | $5.00 \times 10^{-11}$ | Cai N                |
| 6   | ZKSCAN3 - ZSCAN12       | rs35017208  | 0.111                 | 0.01 | [0.0096–0.017] unit decrease  | $1.00 \times 10^{-12}$ | Howard DM            |
| 6   | GPX6, GPX6              | rs13191038  | 0.110                 | 0.01 | [0.0094–0.0168] unit decrease | $4.00 \times 10^{-12}$ | Howard DM            |
| 6   | AL121932.2 - RPSAP2     | rs13194504  | 0.112                 | 0.01 | [0.009–0.0164] unit decrease  | $1.00 \times 10^{-11}$ | Howard DM            |
| 6   | AL121932.2 - RPSAP2     | rs7775835   | NR                    | 5.59 | z score decrease              | $2.00 \times 10^{-8}$  | Nagel M              |
| 6   | NOP56P1 - AL662890.1    | rs3135296   | NR                    | 1.10 | [1.06–1.15]                   | $5.00 \times 10^{-7}$  | Cai N                |
| 6   | NOP56P1 - AL662890.1    | rs3135296   | 0.880                 | 1.06 | [1.04–1.07]                   | $4.00 \times 10^{-12}$ | Cai N                |
| 6   | NOP56P1 - AL662890.1    | rs3135296   | NR                    | 1.14 | [1.08–1.19]                   | $1.00 \times 10^{-6}$  | Cai N                |
| 6   | NOP56P1 - AL662890.1    | rs9257248   | 0.114                 | 0.01 | [0.0086–0.016] unit decrease  | $4.00 \times 10^{-11}$ | Howard DM            |
| 6   | HCG15                   | rs3129791   | 0.115                 | 0.01 | [0.0088–0.0162] unit decrease | $2.00 \times 10^{-11}$ | Howard DM            |
| 6   | AL645937.1 - AL645937.4 | rs3129120   | NR                    | 1.10 | [1.06–1.15]                   | $4.00 \times 10^{-7}$  | Cai N                |
| 6   | AL645937.1 - AL645937.4 | rs3129120   | 0.876                 | 1.08 | NR                            | $1.00 \times 10^{-10}$ | Cai N                |
| 6   | AL645937.4              | rs4947263   | 0.118                 | 0.01 | [0.0092–0.0162] unit decrease | $3.00 \times 10^{-12}$ | Howard DM            |
| 6   | AL672167.1              | rs9257681   | 0.115                 | 0.01 | [0.0094–0.0168] unit decrease | $2.00 \times 10^{-12}$ | Howard DM            |
| 6   | OR11A1                  | rs2523443   | 0.119                 | 0.01 | [0.0095–0.0165] unit decrease | $1.00 \times 10^{-12}$ | Howard DM            |
| 6   | GABBR1                  | rs926552    | 0.860                 | 1.11 | [1.07–1.14]                   | $4.00 \times 10^{-8}$  | Cai N                |
| 6   | GABBR1                  | rs1233393   | 0.122                 | 0.01 | [0.0094–0.0164] unit decrease | $8.00 \times 10^{-13}$ | Howard DM            |
| 6   | AL645939.4 - HLA-V      | rs9258375   | 0.122                 | 0.01 | [0.0094–0.0168] unit decrease | $1.00 \times 10^{-12}$ | Howard DM            |
| 6   | HCG9                    | rs3132685   | 0.130                 | 0.01 | [0.0096–0.0166] unit decrease | $2.00 \times 10^{-13}$ | Howard DM            |
| 6   | ZNRD1ASP                | rs3094146   | 0.870                 | 1.15 | [1.10–1.20]                   | $5.00 \times 10^{-8}$  | Cai N                |
| 6   | ZNRD1ASP                | rs3115631   | NR                    | 1.10 | [1.06–1.15]                   | $4.00 \times 10^{-7}$  | Cai N                |
| 6   | ZNRD1ASP                | rs3115631   | 0.874                 | 1.06 | [1.04–1.08]                   | $3.00 \times 10^{-13}$ | Cai N                |
| 6   | TRIM31                  | rs2517601   | 0.133                 | 0.01 | [0.0093–0.0159] unit decrease | $5.00 \times 10^{-13}$ | Howard DM            |
| 6   | PAIP1P1                 | rs2517622   | 0.863                 | 1.08 | NR                            | $4.00 \times 10^{-11}$ | Cai N                |
| 6   | PAIP1P1                 | rs2517622   | NR                    | 1.12 | [1.07–1.18]                   | $3.00 \times 10^{-6}$  | Cai N                |
| 6   | UBQLN1P1 - MICC         | rs3130116   | 0.139                 | 0.01 | [0.0091–0.0157] unit decrease | $6.00 \times 10^{-13}$ | Howard DM            |
| 6   | HLA-E - LINC02569       | rs3131115   | 0.672                 | 1.08 | [1.05–1.12]                   | $1.00 \times 10^{-7}$  | Coleman JRI          |
| 6   | HLA-E - LINC02569       | rs28894081  | 0.066                 | 0.01 | [0.0079–0.0173] unit increase | $1.00 \times 10^{-7}$  | Howard DM            |
| 6   | GNL1                    | rs2524222   | 0.220                 | 0.03 | [0.02–0.047] unit increase    | $1.00 \times 10^{-6}$  | Hyde CL              |
| 6   | HCG20                   | rs2284174   | 0.219                 | 0.01 | [0.0075–0.0129] unit decrease | $1.00 \times 10^{-12}$ | Howard DM            |
| 6   | HCG20                   | rs115507122 | 0.820                 | 1.04 | [1.03–1.05]                   | $3.00 \times 10^{-11}$ | Wray NR              |
| 6   | NAPGP2 - MUC21          | rs3131781   | 0.145                 | 0.01 | [0.0064–0.013] unit decrease  | $9.00 \times 10^{-9}$  | Howard DM            |
| 6   | NAPGP2 - MUC21          | rs9368649   | 0.140                 |      |                               | $1.00 \times 10^{-8}$  | Amare AT             |
| 6   | RNU6-1133P - C6orf15    | rs28732092  | 0.079                 | 0.01 | [0.0067–0.0153] unit increase | $5.00 \times 10^{-7}$  | Howard DM            |
| 6   | HLA-B                   | rs1625792   | 0.853                 | 1.04 | [1.03–1.05]                   | $5.00 \times 10^{-8}$  | Cai N                |
| 6   | HLA-B                   | rs2596505   | 0.168                 | 0.01 | [0.0059–0.0121] unit decrease | $1.00 \times 10^{-8}$  | Howard DM            |
| 6   | PRRC2A                  | rs2736155   | 0.478                 | 0.01 | [0.0035–0.0083] unit increase | $6.00 \times 10^{-7}$  | Howard DM            |
| 6   | CFB                     | rs537160    | 0.639                 | 0.01 | [0.0039–0.0087] unit increase | $3.00 \times 10^{-7}$  | Howard DM            |
| 6   | HLA-DRB1 - HLA-DQA1     | rs535777    | NR                    | 1.04 | [1.02–1.05]                   | $5.00 \times 10^{-6}$  | Cai N                |
| 6   | HLA-DRB1 - HLA-DQA1     | rs535777    | 0.862                 | 1.08 | NR                            | $1.00 \times 10^{-9}$  | Cai N                |
| 6   | MLN - LINC01016         | rs56366527  | 0.386                 | 0.01 | [0.0038–0.0086] unit decrease | $2.00 \times 10^{-7}$  | Howard DM            |
| 6   | MLN - LINC01016         | rs6922076   | 0.546                 | 1.07 | [1.04–1.1]                    | $7.00 \times 10^{-6}$  | Coleman JRI          |
| 6   | PPIL1                   | rs236346    | 0.905                 | 1.05 | [1.03–1.07]                   | $1.00 \times 10^{-8}$  | Cai N                |
| 6   | GLO1                    | rs116078874 | NR                    | 0.47 | [0.27–0.67] unit increase     | $4.00 \times 10^{-6}$  | Hall LS              |
| 6   | TUBBP9 - AL139275.2     | rs10947863  | 0.747                 | 1.08 | [1.05–1.11]                   | $2.00 \times 10^{-6}$  | Coleman JRI          |
| 6   | AL109615.4 - MRPL14     | rs7742824   | 0.224                 | 1.19 | [1.11–1.26]                   | $9.00 \times 10^{-6}$  | GENDEP Investigators |
| 6   | FTHP15 - AL158050.2     | rs1575671   | 0.139                 | 1.07 | [1.04–1.1]                    | $7.00 \times 10^{-6}$  | Coleman JRI          |
| 6   | FTHP15 - AL158050.2     | rs116100277 | 0.014                 | 1.07 | [1.04–1.1]                    | $1.00 \times 10^{-6}$  | Coleman JRI          |
| 6   | ADH5P4 - NUFIP1P1       | rs9363467   | 0.604                 | 1.02 | [1.011–1.021]                 | $3.00 \times 10^{-12}$ | Howard DM            |
| 6   | ADH5P4 - NUFIP1P1       | rs76736233  | 0.134                 | 0.01 | [0.0055–0.0125] unit increase | $3.00 \times 10^{-7}$  | Howard DM            |
| 6   | ADH5P4 - NUFIP1P1       | rs9345737   | 0.561                 | 1.03 | [1.02–1.04]                   | $3.00 \times 10^{-9}$  | Cai N                |
| 6   | AL713998.3, AL713998.4  | rs140992857 | 0.031                 | 1.07 | [1.04–1.1]                    | $8.00 \times 10^{-6}$  | Coleman JRI          |
| 6   | KCNQ5                   | rs112348907 | 0.296                 | 0.01 | [0.0048–0.0098] unit increase | $2.00 \times 10^{-8}$  | Howard DM            |
| 6   | CASP8AP2                | rs111404313 | NR                    | 0.32 | [0.18–0.46] unit decrease     | $4.00 \times 10^{-6}$  | Hall LS              |
| 6   | AL591519.1              | rs147643734 | 0.960                 | 1.07 | [1.04–1.1]                    | $6.00 \times 10^{-6}$  | Coleman JRI          |
| 6   | AL607077.1 - AL034348.1 | rs71560357  | 0.010                 | 1.07 | [1.04–1.1]                    | $8.00 \times 10^{-6}$  | Coleman JRI          |
| 6   | UFL1-AS1                | rs116842147 | 0.011                 | 1.08 | [1.05–1.1]                    | $6.00 \times 10^{-7}$  | Coleman JRI          |
| 6   | AL078603.1 - MIR548AI   | rs10457592  | 0.761                 | 0.04 | [0.023–0.051] unit decrease   | $6.00 \times 10^{-6}$  | Hyde CL              |
| 6   | AL078603.1 - MIR548AI   | rs9402472   | 0.240                 | 1.03 | [1.02–1.04]                   | $3.00 \times 10^{-8}$  | Wray NR              |
| 6   | AL080285.1 - SIM1       | rs17792983  | 0.305                 | 0.03 | [0.016–0.044] unit decrease   | $6.00 \times 10^{-8}$  | Hyde CL              |
| 6   | AL133338.2 - GRIK2      | rs7758630   | 0.595                 | 1.02 | [1.01–1.02]                   | $8.00 \times 10^{-14}$ | Howard DM            |
| 6   | GRIK2                   | rs112904378 | 0.035                 | 1.07 | [1.04–1.1]                    | $9.00 \times 10^{-6}$  | Coleman JRI          |
| 6   | LIN28B-AS1              | rs1933802   | 0.546                 | 1.02 | [1.02–1.02]                   | $1.00 \times 10^{-19}$ | Howard DM            |
| 6   | LIN28B                  | rs1475120   | 0.452                 | 0.03 | [0.017–0.041] unit decrease   | $4.00 \times 10^{-9}$  | Hyde CL              |
| 6   | DDO                     | rs10447426  | 0.043                 | 0.02 | [0.0094–0.0212] unit decrease | $3.00 \times 10^{-7}$  | Howard DM            |
| 6   | AL355337.1              | rs2876520   | 0.467                 | 0.01 | [0.0038–0.0086] unit increase | $2.00 \times 10^{-7}$  | Howard DM            |

| Chr | Gene                           | SNP         | Risk Allele Frequency | Beta | 95% CI                        | P                      | First Author         |
|-----|--------------------------------|-------------|-----------------------|------|-------------------------------|------------------------|----------------------|
| 6   | <i>AL355337.1</i>              | rs2876520   | 0.473                 | 1.02 | [1.01–1.02]                   | $3.00 \times 10^{-17}$ | Howard DM            |
| 6   | <i>SAMD5</i>                   | rs725616    | 0.364                 | 1.01 | [1.009–1.018]                 | $1.00 \times 10^{-9}$  | Howard DM            |
| 6   | <i>CCDC170</i>                 | rs149389640 | NR                    | 6.18 | z score increase              | $7.00 \times 10^{-10}$ | Nagel M              |
| 6   | <i>SLC22A2</i>                 | rs117901488 | NR                    | 0.20 | [0.12–0.28] unit increase     | $6.00 \times 10^{-6}$  | Hall LS              |
| 6   | <i>AL358972.1 - AL450345.2</i> | rs4709845   | 0.850                 | 1.21 | [NR]                          | $9.00 \times 10^{-6}$  | Lewis CM             |
| 6   | <i>AL358972.1 - AL450345.2</i> | rs2029865   | 0.547                 | 1.02 | [1.01–1.02]                   | $4.00 \times 10^{-17}$ | Howard DM            |
| 6   | <i>AL358972.1 - AL450345.2</i> | rs10806805  | 0.540                 | 0.03 | [0.015–0.038] unit increase   | $6.00 \times 10^{-6}$  | Hyde CL              |
| 7   | <i>MAD1L1, AC069288.1</i>      | rs2056477   | NR                    | 5.47 | z score decrease              | $4.00 \times 10^{-8}$  | Nagel M              |
| 7   | <i>AC069288.1, MAD1L1</i>      | rs56072378  | 0.220                 | 0.00 | [0.0021–0.0049] unit decrease | $9.00 \times 10^{-7}$  | Howard DM            |
| 7   | <i>MAD1L1, AC069288.1</i>      | rs3823624   | 0.807                 | 1.03 | [1.024–1.036]                 | $2.00 \times 10^{-26}$ | Howard DM            |
| 7   | <i>THSD7A - TMEM106B</i>       | rs3807866   | 0.410                 | 1.04 | [1.03–1.05]                   | $5.00 \times 10^{-13}$ | Cai N                |
| 7   | <i>THSD7A - TMEM106B</i>       | rs3807866   | 0.398                 | 1.08 | [1.05–1.11]                   | $1.00 \times 10^{-7}$  | Coleman JRI          |
| 7   | <i>THSD7A - TMEM106B</i>       | rs3807865   | 0.412                 | 0.01 | [0.0058–0.0106] unit increase | $7.00 \times 10^{-12}$ | Howard DM            |
| 7   | <i>TMEM106B</i>                | rs2043539   | 0.418                 | 1.02 | [1.018–1.027]                 | $8.00 \times 10^{-24}$ | Howard DM            |
| 7   | <i>TMEM106B</i>                | rs3823612   | NR                    | 6.58 | z score increase              | $5.00 \times 10^{-11}$ | Nagel M              |
| 7   | <i>TMEM106B</i>                | rs10950398  | 0.410                 | 1.03 | [1.02–1.04]                   | $3.00 \times 10^{-8}$  | Wray NR              |
| 7   | <i>TMEM106B</i>                | rs5011432   | 0.412                 | 0.01 | [0.0048–0.0098] unit increase | $2.00 \times 10^{-8}$  | Howard DM            |
| 7   | <i>AC011287.1 - AC005019.2</i> | rs9648182   | NR                    | 0.11 | [0.051–0.169] unit decrease   | $8.00 \times 10^{-6}$  | Hall LS              |
| 7   | <i>AC011287.1 - AC005019.2</i> | rs9648182   | 0.120                 | 0.17 | [0.11–0.23] unit decrease     | $9.00 \times 10^{-8}$  | Hall LS              |
| 7   | <i>DGKB</i>                    | rs10227749  | NR                    | 0.12 | [0.061–0.179] unit increase   | $4.00 \times 10^{-6}$  | Hall LS              |
| 7   | <i>AC007091.1</i>              | rs12667733  | 0.496                 | 0.00 | [0.002–0.0044] unit decrease  | $6.00 \times 10^{-8}$  | Howard DM            |
| 7   | <i>SP4</i>                     | rs17144465  | 0.030                 | 1.56 | [NR]                          | $8.00 \times 10^{-7}$  | Shyn SI              |
| 7   | <i>SP4</i>                     | rs17144465  | 0.040                 | 1.82 |                               | $6.00 \times 10^{-6}$  | Shi J                |
| 7   | <i>CDCA7L - RAPGEF5</i>        | rs10247376  | 0.028                 | 1.07 | [1.04–1.1]                    | $8.00 \times 10^{-6}$  | Coleman JRI          |
| 7   | <i>GSDME</i>                   | rs2721811   | NR                    | 5.50 | z score decrease              | $4.00 \times 10^{-8}$  | Nagel M              |
| 7   | <i>ADCYAP1R1 - AC006466.1</i>  | rs1558477   |                       |      |                               | $3.00 \times 10^{-7}$  | Aragam N             |
| 7   | <i>VPS41</i>                   | rs10274968  | NR                    | 5.71 | z score increase              | $1.00 \times 10^{-8}$  | Nagel M              |
| 7   | <i>AC073115.2</i>              | rs2462686   | 0.351                 | 1.49 | [1.31–1.66]                   | $9.00 \times 10^{-6}$  | GENDEP Investigators |
| 7   | <i>AC073873.1 - GALNT17</i>    | rs1525293   | 0.660                 | 1.70 | [1.48–1.92]                   | $2.00 \times 10^{-6}$  | GENDEP Investigators |
| 7   | <i>MAGI2</i>                   | rs535355    | 0.378                 | 1.15 | [1.1–1.21]                    | $7.00 \times 10^{-7}$  | Coleman JRI          |
| 7   | <i>CD36 - SEMA3C</i>           | rs111747875 | 0.019                 | 1.07 | [1.04–1.1]                    | $3.00 \times 10^{-6}$  | Coleman JRI          |
| 7   | <i>CACNA2D1</i>                | rs17176546  | 0.040                 | 0.26 | [0.16–0.36] unit increase     | $8.00 \times 10^{-7}$  | Hall LS              |
| 7   | <i>PCLO</i>                    | rs2715148   |                       |      |                               | $1.00 \times 10^{-6}$  | Aragam N             |
| 7   | <i>PCLO</i>                    | rs2247523   | 0.468                 | 1.02 | [1.01–1.02]                   | $9.00 \times 10^{-14}$ | Howard DM            |
| 7   | <i>PCLO</i>                    | rs2247523   | NR                    |      |                               | $5.00 \times 10^{-6}$  | Liu Y                |
| 7   | <i>PCLO</i>                    | rs2715157   | 0.520                 | 1.27 | [1.16–1.37]                   | $3.00 \times 10^{-8}$  | Mbarek H             |
| 7   | <i>PCLO - AC079799.1</i>       | rs16887442  | 0.435                 | 1.02 | [1.011–1.019]                 | $1.00 \times 10^{-11}$ | Howard DM            |
| 7   | <i>AC002386.1 - AC073071.1</i> | rs58104186  | 0.469                 | 1.02 | [1.015–1.024]                 | $4.00 \times 10^{-18}$ | Howard DM            |
| 7   | <i>AC002386.1 - AC073071.1</i> | rs12666117  | 0.470                 | 1.03 | [1.02–1.04]                   | $1.00 \times 10^{-8}$  | Wray NR              |
| 7   | <i>LINC01392</i>               | rs6466512   | 0.417                 | 0.01 | [0.0035–0.0083] unit decrease | $8.00 \times 10^{-7}$  | Howard DM            |
| 7   | <i>CTTNBP2</i>                 | rs7807677   | 0.551                 | 1.02 | [1.017–1.026]                 | $5.00 \times 10^{-22}$ | Howard DM            |
| 7   | <i>AC007568.1 - AC003084.1</i> | rs2402273   | 0.409                 | 0.01 | [0.0048–0.0096] unit increase | $2.00 \times 10^{-9}$  | Howard DM            |
| 7   | <i>AC006148.1</i>              | rs138879850 | 0.991                 | 1.08 | [1.05–1.11]                   | $2.00 \times 10^{-7}$  | Coleman JRI          |
| 7   | <i>GRM8</i>                    | rs17864092  | 0.900                 | 0.17 | [NR] unit decrease            | $6.00 \times 10^{-6}$  | Terracciano A        |
| 7   | <i>TSPAN33</i>                 | rs34534607  | 0.201                 | 1.07 | [1.04–1.1]                    | $6.00 \times 10^{-6}$  | Coleman JRI          |
| 7   | <i>MKLN1</i>                   | rs10265216  | 0.280                 | 1.19 | [NR]                          | $3.00 \times 10^{-6}$  | Shyn SI              |
| 7   | <i>OR6W1P - PIP</i>            | rs28672333  | 0.073                 | 1.16 | [1.1–1.22]                    | $2.00 \times 10^{-7}$  | Coleman JRI          |
| 7   | <i>RNY4 - RNY3</i>             | rs1676905   | 0.926                 | 1.07 | [1.04–1.1]                    | $3.00 \times 10^{-6}$  | Coleman JRI          |
| 7   | <i>KRBA1</i>                   | rs748441912 | NR                    |      |                               | $5.00 \times 10^{-7}$  | Wong ML              |
| 7   | <i>AC006348.1 - AC079809.1</i> | rs144369419 | 0.011                 | 0.03 | [0.018–0.042] unit decrease   | $5.00 \times 10^{-7}$  | Howard DM            |
| 8   | <i>ATP6V1B2</i>                | rs1106634   | 0.140                 | 1.30 | [NR]                          | $7.00 \times 10^{-7}$  | Shyn SI              |
| 8   | <i>SLC25A37 - RNU4-71P</i>     | rs950893    | 0.280                 | 4.76 | z score decrease              | $2.00 \times 10^{-6}$  | Peterson RE          |
| 8   | <i>SLC25A37 - RNU4-71P</i>     | rs950893    | 0.280                 | 5.79 | z score decrease              | $7.00 \times 10^{-9}$  | Peterson RE          |
| 8   | <i>CDCA2 - AC009623.1</i>      | rs2012485   | 0.033                 | 0.08 | [0.046–0.108] unit increase   | $3.00 \times 10^{-6}$  | Hyde CL              |
| 8   | <i>NRG1</i>                    | rs117715236 | NR                    | 0.24 | [0.14–0.34] unit decrease     | $4.00 \times 10^{-6}$  | Hall LS              |
| 8   | <i>AC090993.1 - LINC01288</i>  | rs139340185 | 0.010                 | 1.07 | [1.04–1.1]                    | $7.00 \times 10^{-6}$  | Coleman JRI          |
| 8   | <i>PCMTD1</i>                  | rs9298467   | 0.809                 | 0.04 | [0.023–0.054] unit decrease   | $2.00 \times 10^{-7}$  | Hyde CL              |
| 8   | <i>CHD7</i>                    | rs4289855   | 0.228                 | 1.04 | [NR]                          | $2.00 \times 10^{-7}$  | Li X                 |
| 8   | <i>CYP7B1</i>                  | rs7837935   | 0.848                 | 1.02 | [1.02–1.03]                   | $1.00 \times 10^{-13}$ | Howard DM            |
| 8   | <i>TRIM55</i>                  | rs7835340   | NR                    | 0.09 | [0.051–0.129] unit increase   | $3.00 \times 10^{-6}$  | Hall LS              |
| 8   | <i>AC022730.2 - AC022730.3</i> | rs67436663  | 0.760                 | 1.01 | [1.01–1.02]                   | $3.00 \times 10^{-8}$  | Howard DM            |
| 8   | <i>AC103409.1</i>              | rs12547341  | NR                    | 0.08 | [0.041–0.119] unit increase   | $5.00 \times 10^{-6}$  | Hall LS              |
| 8   | <i>C8orf37-AS1</i>             | rs145478122 | NR                    | 0.30 | [0.16–0.44] unit decrease     | $9.00 \times 10^{-6}$  | Hall LS              |
| 8   | <i>RNF19A - AP001574.1</i>     | rs79802045  | NR                    | 0.25 | [0.13–0.37] unit decrease     | $5.00 \times 10^{-6}$  | Hall LS              |
| 8   | <i>ZFPM2</i>                   | rs4565433   | 0.159                 | 1.07 | [1.04–1.1]                    | $2.00 \times 10^{-6}$  | Coleman JRI          |
| 8   | <i>TRPS1</i>                   | rs2721937   | NR                    |      |                               | $8.00 \times 10^{-6}$  | Sullivan PF          |
| 8   | <i>KCNQ3</i>                   | rs186555608 | 0.985                 | 1.08 | [1.04–1.11]                   | $1.00 \times 10^{-6}$  | Coleman JRI          |
| 8   | <i>AC105213.1</i>              | rs6995581   | 0.209                 | 1.07 | [1.04–1.11]                   | $3.00 \times 10^{-6}$  | Coleman JRI          |

| Chr | Gene                           | SNP         | Risk Allele Frequency | Beta | 95% CI                        | P                      | First Author         |
|-----|--------------------------------|-------------|-----------------------|------|-------------------------------|------------------------|----------------------|
| 8   | <i>TRAPPC9</i>                 | rs79225303  | NR                    | 0.17 | [0.092–0.248] unit decrease   | $2.00 \times 10^{-6}$  | Hall LS              |
| 9   | <i>DMRT1</i>                   | rs364477    | 0.215                 | 1.69 | [1.47–1.92]                   | $4.00 \times 10^{-6}$  | GENDEP Investigators |
| 9   | <i>CARM1P1</i>                 | rs7044150   | 0.385                 | 0.03 | [0.018–0.042] unit decrease   | $4.00 \times 10^{-8}$  | Hyde CL              |
| 9   | <i>CARM1P1</i>                 | rs1354115   | 0.624                 | 1.02 | [1.014–1.023]                 | $4.00 \times 10^{-17}$ | Howard DM            |
| 9   | <i>CARM1P1</i>                 | rs1354115   | 0.620                 | 1.03 | [1.02–1.04]                   | $2.00 \times 10^{-8}$  | Wray NR              |
| 9   | <i>AKAP8P1 - AL451129.1</i>    | rs10809385  | 0.404                 | 0.01 | [0.0041–0.0089] unit decrease | $6.00 \times 10^{-8}$  | Howard DM            |
| 9   | <i>AKAP8P1 - AL451129.1</i>    | rs10959631  | NR                    | 0.10 | [0.061–0.139] unit decrease   | $4.00 \times 10^{-6}$  | Hall LS              |
| 9   | <i>AKAP8P1 - AL451129.1</i>    | rs10959631  | 0.200                 | 0.12 | [0.081–0.159] unit decrease   | $8.00 \times 10^{-7}$  | Hall LS              |
| 9   | <i>AKAP8P1 - AL451129.1</i>    | rs11515172  | 0.784                 | 1.09 | [1.06–1.12]                   | $4.00 \times 10^{-8}$  | Coleman JRI          |
| 9   | <i>AL355672.1 - AL592227.1</i> | rs56116032  | 0.222                 | 0.01 | [0.0049–0.0103] unit decrease | $8.00 \times 10^{-8}$  | Howard DM            |
| 9   | <i>AL355672.1 - AL592227.1</i> | rs1982277   | 0.759                 | 1.02 | [1.016–1.026]                 | $1.00 \times 10^{-15}$ | Howard DM            |
| 9   | <i>AL355672.1 - AL592227.1</i> | rs10959913  | 0.760                 | 1.03 | [1.02–1.04]                   | $5.00 \times 10^{-9}$  | Wray NR              |
| 9   | <i>AL355672.1 - AL592227.1</i> | rs10959926  | 0.218                 | 0.01 | [0.0051–0.0105] unit decrease | $6.00 \times 10^{-8}$  | Howard DM            |
| 9   | <i>AL353595.1</i>              | rs10960103  | 0.227                 | 0.01 | [0.0049–0.0103] unit decrease | $5.00 \times 10^{-8}$  | Howard DM            |
| 9   | <i>AL162725.2</i>              | rs263645    | 0.544                 | 1.02 | [1.013–1.022]                 | $7.00 \times 10^{-16}$ | Howard DM            |
| 9   | <i>AL162725.2</i>              | rs263575    | 0.460                 | 0.01 | [0.0042–0.009] unit decrease  | $2.00 \times 10^{-8}$  | Howard DM            |
| 9   | <i>AL162725.2</i>              | rs393488    | 0.531                 | 1.03 | [1.02–1.04]                   | $2.00 \times 10^{-10}$ | Cai N                |
| 9   | <i>ELAVL2</i>                  | rs3793577   | NR                    | 6.99 | z score decrease              | $3.00 \times 10^{-12}$ | Nagel M              |
| 9   | <i>ELAVL2</i>                  | rs3793577   | 0.534                 | 1.02 | [1.02–1.03]                   | $6.00 \times 10^{-22}$ | Howard DM            |
| 9   | <i>ELAVL2</i>                  | rs10811965  | NR                    | 5.63 | z score decrease              | $2.00 \times 10^{-8}$  | Nagel M              |
| 9   | <i>RN7SKP120 - AL353730.1</i>  | rs59283172  | 0.893                 | 1.02 | [1.01–1.02]                   | $1.00 \times 10^{-6}$  | Howard DM            |
| 9   | <i>RN7SKP120 - AL353730.1</i>  | rs12057031  | 0.892                 | 1.05 | [1.03–1.07]                   | $5.00 \times 10^{-9}$  | Cai N                |
| 9   | <i>RN7SKP120 - AL353730.1</i>  | rs73474148  | 0.110                 | 0.01 | [0.0065–0.0139] unit decrease | $7.00 \times 10^{-8}$  | Howard DM            |
| 9   | <i>HSPA8P17 - AL354854.1</i>   | rs34653192  | 0.680                 | 1.02 | [1.02–1.02]                   | $3.00 \times 10^{-16}$ | Howard DM            |
| 9   | <i>B4GALT1-AS1 - SPINK4</i>    | rs62544433  | 0.114                 | 0.01 | [0.0064–0.0142] unit increase | $4.00 \times 10^{-7}$  | Howard DM            |
| 9   | <i>AL356218.2 - AQP3</i>       | rs10758202  | NR                    | 0.14 | [0.081–0.199] unit increase   | $2.00 \times 10^{-6}$  | Hall LS              |
| 9   | <i>PAX5</i>                    | rs7030813   | 0.374                 | 0.01 | [0.0038–0.0086] unit increase | $4.00 \times 10^{-7}$  | Howard DM            |
| 9   | <i>PAX5</i>                    | rs7030813   | 0.374                 | 1.03 | [1.021–1.03]                  | $9.00 \times 10^{-30}$ | Howard DM            |
| 9   | <i>AL161781.2, PAX5</i>        | rs6476606   | 0.637                 | 0.03 | [0.016–0.039] unit decrease   | $1.00 \times 10^{-8}$  | Hyde CL              |
| 9   | <i>TRPM3</i>                   | rs188386326 | 0.014                 | 1.07 | [1.04–1.1]                    | $8.00 \times 10^{-6}$  | Coleman JRI          |
| 9   | <i>FAM120A</i>                 | rs12376738  | NR                    | 5.65 | z score increase              | $2.00 \times 10^{-8}$  | Nagel M              |
| 9   | <i>ASTN2</i>                   | rs10817969  | 0.717                 | 1.02 | [1.012–1.022]                 | $1.00 \times 10^{-12}$ | Howard DM            |
| 9   | <i>ASTN2</i>                   | rs7856424   | 0.710                 | 1.03 | [1.02–1.04]                   | $9.00 \times 10^{-9}$  | Wray NR              |
| 9   | <i>AL160272.2, TLR4</i>        | rs913930    | 0.357                 | 1.02 | [1.02–1.03]                   | $1.00 \times 10^{-21}$ | Howard DM            |
| 9   | <i>AL160272.2</i>              | rs2149351   | NR                    | 5.55 | z score increase              | $3.00 \times 10^{-8}$  | Nagel M              |
| 9   | <i>AC006288.1 - LINC01613</i>  | rs2781093   | 0.723                 | 1.07 | [1.04–1.1]                    | $9.00 \times 10^{-6}$  | Coleman JRI          |
| 9   | <i>DENND1A</i>                 | rs2670139   | 0.239                 | 1.02 | [1.01–1.02]                   | $2.00 \times 10^{-12}$ | Howard DM            |
| 9   | <i>DENND1A</i>                 | rs7029033   | 0.070                 | 1.05 | [1.03–1.07]                   | $3.00 \times 10^{-8}$  | Wray NR              |
| 9   | <i>DENND1A</i>                 | rs12115299  | 0.069                 | 0.05 | [0.029–0.076] unit increase   | $2.00 \times 10^{-6}$  | Hyde CL              |
| 9   | <i>SLC2A8</i>                  | rs115668237 | NR                    |      |                               | $6.00 \times 10^{-6}$  | Wong ML              |
| 9   | <i>AK8</i>                     | rs12552369  | 0.494                 | 1.16 | [1.1–1.21]                    | $8.00 \times 10^{-6}$  | GENDEP Investigators |
| 10  | <i>ADARB2 - AL355597.1</i>     | rs997934    | 0.380                 | 1.02 | [1.012–1.021]                 | $5.00 \times 10^{-13}$ | Howard DM            |
| 10  | <i>AL713851.1</i>              | rs78245978  | NR                    | 0.43 | [0.25–0.61] unit increase     | $6.00 \times 10^{-6}$  | Hall LS              |
| 10  | <i>RSU1</i>                    | rs61842316  | NR                    | 0.27 | [0.15–0.39] unit increase     | $3.00 \times 10^{-6}$  | Hall LS              |
| 10  | <i>LINC01517 - LYZL1</i>       | rs1612122   | 0.480                 | 1.17 | [NR]                          | $7.00 \times 10^{-6}$  | Shyn SI              |
| 10  | <i>ITGB1-DT</i>                | rs11009175  | 0.170                 | 0.16 | [NR] unit increase            | $5.00 \times 10^{-6}$  | Terracciano A        |
| 10  | <i>LINC02629 - PARD3</i>       | rs1780436   |                       |      |                               | $3.00 \times 10^{-6}$  | Aragam N             |
| 10  | <i>LINC02629 - PARD3</i>       | rs1780436   | NR                    |      |                               | $7.00 \times 10^{-6}$  | Liu Y                |
| 10  | <i>RASGEF1A</i>                | rs2460546   | NR                    | 0.29 | [0.17–0.41] unit increase     | $4.00 \times 10^{-6}$  | Hall LS              |
| 10  | <i>AC069545.1 - ZWINT</i>      | rs117778141 | NR                    | 0.50 | [0.3–0.7] unit decrease       | $1.00 \times 10^{-6}$  | Hall LS              |
| 10  | <i>CTNNA3</i>                  | rs10762080  | 0.586                 | 0.01 | [0.0036–0.0084] unit decrease | $6.00 \times 10^{-7}$  | Howard DM            |
| 10  | <i>RNU6-523P - RPL12P8</i>     | rs12415800  | 0.460                 | 5.02 | z score increase              | $5.00 \times 10^{-7}$  | Peterson RE          |
| 10  | <i>RNU6-523P - RPL12P8</i>     | rs12415800  | 0.460                 | 4.66 | z score increase              | $3.00 \times 10^{-6}$  | Peterson RE          |
| 10  | <i>DDX50 - DDX21</i>           | rs2017305   | 0.920                 | 0.22 | [NR] unit decrease            | $9.00 \times 10^{-6}$  | Terracciano A        |
| 10  | <i>AC012560.2</i>              | rs164241    | 0.089                 | 1.14 | [1.09–1.2]                    | $2.00 \times 10^{-6}$  | Coleman JRI          |
| 10  | <i>GRID1</i>                   | rs55940619  | 0.923                 | 1.15 | [1.09–1.21]                   | $4.00 \times 10^{-6}$  | Coleman JRI          |
| 10  | <i>SORCS3</i>                  | rs11599236  | 0.592                 | 1.03 | [1.02–1.04]                   | $3.00 \times 10^{-8}$  | Cai N                |
| 10  | <i>SORCS3</i>                  | rs11599236  | 0.409                 | 0.01 | [0.0041–0.0089] unit decrease | $8.00 \times 10^{-8}$  | Howard DM            |
| 10  | <i>SORCS3</i>                  | rs61867293  | 0.800                 | 1.04 | [1.03–1.05]                   | $7.00 \times 10^{-10}$ | Wray NR              |
| 10  | <i>SORCS3</i>                  | rs1021363   | 0.642                 | 0.01 | [0.0046–0.0094] unit decrease | $1.00 \times 10^{-8}$  | Howard DM            |
| 10  | <i>SORCS3</i>                  | rs1021363   | 0.355                 | 1.02 | [1.018–1.027]                 | $4.00 \times 10^{-23}$ | Howard DM            |
| 10  | <i>SORCS3</i>                  | rs10786831  | 0.601                 | 0.03 | [0.018–0.041] unit decrease   | $8.00 \times 10^{-9}$  | Hyde CL              |
| 10  | <i>SORCS3</i>                  | rs10786831  | NR                    | 1.03 | [1.015–1.036]                 | $2.00 \times 10^{-6}$  | Cai N                |
| 10  | <i>SORCS3</i>                  | rs1961639   | NR                    | 5.89 | z score decrease              | $4.00 \times 10^{-9}$  | Nagel M              |
| 10  | <i>ENO4</i>                    | rs12240686  | NR                    | 0.18 | [0.1–0.26] unit decrease      | $6.00 \times 10^{-6}$  | Hall LS              |
| 10  | <i>MCMBP</i>                   | rs113416614 | 0.068                 | 1.07 | [1.04–1.1]                    | $8.00 \times 10^{-6}$  | Coleman JRI          |
| 10  | <i>LHPP</i>                    | rs35936514  | 0.260                 | 4.78 | z score decrease              | $2.00 \times 10^{-6}$  | Peterson RE          |
| 11  | <i>MUC5B</i>                   | rs56293203  | NR                    |      |                               | $2.00 \times 10^{-9}$  | Wong ML              |

| Chr | Gene                           | SNP         | Risk Allele Frequency | Beta | 95% CI                        | P                      | First Author         |
|-----|--------------------------------|-------------|-----------------------|------|-------------------------------|------------------------|----------------------|
| 11  | <i>EIF3F</i>                   | rs12420464  | 0.040                 | 0.38 | [NR] unit decrease            | $3.00 \times 10^{-6}$  | Terracciano A        |
| 11  | <i>METTL15 - LINC02758</i>     | rs10767735  | 0.395                 | 0.01 | [0.0036–0.0084] unit decrease | $7.00 \times 10^{-7}$  | Howard DM            |
| 11  | <i>DCDC1, ALI22014.1</i>       | rs620339    | 0.593                 | 0.03 | [0.018–0.042] unit decrease   | $8.00 \times 10^{-8}$  | Hyde CL              |
| 11  | <i>DCDC1</i>                   | rs1448938   | 0.417                 | 1.02 | [1.013–1.022]                 | $4.00 \times 10^{-15}$ | Howard DM            |
| 11  | <i>AL035078.4, PAUPAR</i>      | rs1806153   | 0.220                 | 1.04 | [1.03–1.05]                   | $1.00 \times 10^{-9}$  | Wray NR              |
| 11  | <i>AL035078.4, PAUPAR</i>      | rs1806152   | 0.172                 | 0.04 | [0.026–0.057] unit increase   | $4.00 \times 10^{-7}$  | Hyde CL              |
| 11  | <i>CCDC73</i>                  | rs143864773 | 0.931                 | 1.08 | [1.05–1.11]                   | $1.00 \times 10^{-6}$  | Coleman JRI          |
| 11  | <i>AC090692.2 - KRT18P14</i>   | rs11033303  | 0.370                 | 0.09 | [0.051–0.129] unit increase   | $2.00 \times 10^{-7}$  | Hall LS              |
| 11  | <i>AC090692.2 - KRT18P14</i>   | rs11033303  | 0.370                 | 0.11 | [0.071–0.149] unit increase   | $6.00 \times 10^{-7}$  | Hall LS              |
| 11  | <i>ZDHHC5</i>                  | rs10896636  | NR                    | 5.96 | z score decrease              | $3.00 \times 10^{-9}$  | Nagel M              |
| 11  | <i>OR5BA1P - OR5AZ1P</i>       | rs2509805   | 0.321                 | 1.02 | [1.015–1.024]                 | $5.00 \times 10^{-16}$ | Howard DM            |
| 11  | <i>MS4A1 - MS4A12</i>          | rs17615103  | NR                    | 0.22 | [0.12–0.32] unit increase     | $6.00 \times 10^{-6}$  | Hall LS              |
| 11  | <i>MS4A13</i>                  | rs150439352 | NR                    | 0.47 | [0.27–0.67] unit increase     | $4.00 \times 10^{-6}$  | Hall LS              |
| 11  | <i>DAGLA</i>                   | rs198457    | 0.808                 | 1.02 | [1.02–1.03]                   | $5.00 \times 10^{-14}$ | Howard DM            |
| 11  | <i>LTBP3</i>                   | rs58621819  | 0.210                 | 1.02 | [1.01–1.02]                   | $2.00 \times 10^{-10}$ | Howard DM            |
| 11  | <i>CCS</i>                     | rs1791684   | 0.526                 | 0.01 | [0.0037–0.0085] unit increase | $3.00 \times 10^{-7}$  | Howard DM            |
| 11  | <i>LTO1 - FGF19</i>            | rs80208956  | NR                    | 0.30 | [0.16–0.44] unit increase     | $6.00 \times 10^{-6}$  | Hall LS              |
| 11  | <i>SHANK2</i>                  | rs7117514   | 0.458                 | 1.02 | [1.01–1.02]                   | $4.00 \times 10^{-14}$ | Howard DM            |
| 11  | <i>MRPL48</i>                  | rs113485090 | 0.040                 | 0.32 | [0.2–0.44] unit decrease      | $2.00 \times 10^{-7}$  | Hall LS              |
| 11  | <i>GRM5</i>                    | rs6483414   | 0.644                 | 0.01 | [0.0045–0.0093] unit increase | $3.00 \times 10^{-8}$  | Howard DM            |
| 11  | <i>GRM5</i>                    | rs1150313   | NR                    | 6.09 | z score increase              | $1.00 \times 10^{-9}$  | Nagel M              |
| 11  | <i>GRM5</i>                    | rs537635    | 0.484                 | 1.03 | [1.02–1.04]                   | $6.00 \times 10^{-10}$ | Cai N                |
| 11  | <i>GRM5</i>                    | rs7932640   | 0.442                 | 1.02 | [1.019–1.027]                 | $3.00 \times 10^{-25}$ | Howard DM            |
| 11  | <i>GRM5</i>                    | rs10501696  | 0.499                 | 0.01 | [0.0055–0.0103] unit decrease | $7.00 \times 10^{-11}$ | Howard DM            |
| 11  | <i>GRM5 - TYR</i>              | rs10830220  | NR                    | 6.10 | z score decrease              | $1.00 \times 10^{-9}$  | Nagel M              |
| 11  | <i>TYR</i>                     | rs621313    | 0.491                 | 0.01 | [0.005–0.0098] unit increase  | $3.00 \times 10^{-10}$ | Howard DM            |
| 11  | <i>TYR</i>                     | rs645592    | NR                    | 5.57 | z score decrease              | $3.00 \times 10^{-8}$  | Nagel M              |
| 11  | <i>TYR</i>                     | rs598769    | 0.470                 | 0.01 | [0.0034–0.0082] unit increase | $9.00 \times 10^{-7}$  | Howard DM            |
| 11  | <i>AP002364.1</i>              | rs578174    | 0.898                 | 1.05 | [1.03–1.07]                   | $2.00 \times 10^{-8}$  | Cai N                |
| 11  | <i>AP002364.1</i>              | rs578174    | 0.104                 | 0.01 | [0.0062–0.0136] unit decrease | $3.00 \times 10^{-7}$  | Howard DM            |
| 11  | <i>CNTN5</i>                   | rs1504721   | 0.398                 | 1.07 | [1.04–1.1]                    | $4.00 \times 10^{-6}$  | Coleman JRI          |
| 11  | <i>CNTN5</i>                   | rs1504722   | 0.397                 | 1.14 | [1.08–1.2]                    | $9.00 \times 10^{-6}$  | Coleman JRI          |
| 11  | <i>CNTN5</i>                   | rs586533    | NR                    | 6.03 | z score decrease              | $2.00 \times 10^{-9}$  | Nagel M              |
| 11  | <i>DYNC2H1 - AP002989.1</i>    | rs141208948 | 0.021                 | 1.07 | [1.04–1.1]                    | $3.00 \times 10^{-6}$  | Coleman JRI          |
| 11  | <i>CASP4</i>                   | rs666723    | NR                    | 0.12 | [0.061–0.179] unit increase   | $7.00 \times 10^{-6}$  | Hall LS              |
| 11  | <i>LINC02550 - C11orf53</i>    | rs10736455  | NR                    | 0.16 | [0.082–0.238] unit decrease   | $4.00 \times 10^{-6}$  | Hall LS              |
| 11  | <i>DRD2 - TMPRSS5</i>          | rs4936275   | 0.622                 | 0.01 | [0.0041–0.0089] unit increase | $1.00 \times 10^{-7}$  | Howard DM            |
| 11  | <i>DRD2 - TMPRSS5</i>          | rs61902811  | 0.632                 | 1.03 | [1.02–1.03]                   | $4.00 \times 10^{-39}$ | Howard DM            |
| 11  | <i>ATP5MG, AP001267.5</i>      | rs60545357  | 0.174                 | 0.01 | [0.0046–0.0108] unit increase | $7.00 \times 10^{-7}$  | Howard DM            |
| 11  | <i>AP001993.1</i>              | rs57344483  | 0.074                 | 1.02 | [1.02–1.03]                   | $5.00 \times 10^{-9}$  | Howard DM            |
| 11  | <i>RPS27P20 - AP003500.1</i>   | rs149415148 | 0.012                 | 0.03 | [0.02–0.044] unit increase    | $4.00 \times 10^{-7}$  | Howard DM            |
| 11  | <i>OPCML</i>                   | rs11223270  | 0.314                 | 1.07 | [1.04–1.1]                    | $8.00 \times 10^{-6}$  | Coleman JRI          |
| 12  | <i>PARP11-AS1 - AC084375.1</i> | rs4238010   | 0.020                 | 1.72 |                               | $6.00 \times 10^{-6}$  | Muglia P             |
| 12  | <i>AC007207.1 - CCND2-AS1</i>  | rs61909191  | 0.934                 | 1.08 | [1.04–1.11]                   | $3.00 \times 10^{-6}$  | Coleman JRI          |
| 12  | <i>AC008012.1</i>              | rs4625554   | 0.300                 | 0.19 | [0.11–0.28] unit increase     | $9.00 \times 10^{-6}$  | GENDEP Investigators |
| 12  | <i>LINC02366</i>               | rs111275535 | 0.060                 | 1.13 | [1.08–1.19]                   | $5.00 \times 10^{-6}$  | Coleman JRI          |
| 12  | <i>AC022276.1 - LINC01559</i>  | rs11055387  | 0.090                 | 2.19 | [1.84–2.53]                   | $8.00 \times 10^{-6}$  | GENDEP Investigators |
| 12  | <i>GRIN2B</i>                  | rs1457614   | 0.181                 | 1.47 | [1.29–1.64]                   | $8.00 \times 10^{-6}$  | GENDEP Investigators |
| 12  | <i>AC048352.1</i>              | rs1706631   | 0.408                 | 1.35 | [1.22–1.49]                   | $6.00 \times 10^{-6}$  | GENDEP Investigators |
| 12  | <i>AC084816.1</i>              | rs2466882   | 0.582                 | 1.08 | [1.05–1.11]                   | $1.00 \times 10^{-6}$  | Coleman JRI          |
| 12  | <i>SOX5</i>                    | rs4074723   | 0.590                 | 1.03 | [1.02–1.04]                   | $3.00 \times 10^{-8}$  | Wray NR              |
| 12  | <i>SOX5</i>                    | rs78337797  | 0.878                 | 1.02 | [1.016–1.03]                  | $1.00 \times 10^{-11}$ | Howard DM            |
| 12  | <i>SOX5</i>                    | rs17487383  | NR                    | 5.50 | z score decrease              | $4.00 \times 10^{-8}$  | Nagel M              |
| 12  | <i>AC024145.1, ITPR2</i>       | rs10505997  | 0.882                 | 0.04 | [0.027–0.062] unit increase   | $2.00 \times 10^{-6}$  | Hyde CL              |
| 12  | <i>AC023511.1</i>              | rs11613048  | NR                    | 0.10 | [0.061–0.139] unit decrease   | $8.00 \times 10^{-6}$  | Hall LS              |
| 12  | <i>CPM - AC127894.1</i>        | rs9943849   | 0.730                 | 1.37 | [1.20–1.56]                   | $3.00 \times 10^{-6}$  | Rietschel M          |
| 12  | <i>AC090015.1</i>              | rs17828731  | NR                    | 5.67 | z score increase              | $1.00 \times 10^{-8}$  | Nagel M              |
| 12  | <i>AC093025.1 - AC090679.3</i> | rs56314503  | 0.251                 | 1.02 | [1.02–1.03]                   | $1.00 \times 10^{-16}$ | Howard DM            |
| 12  | <i>AC093025.1 - AC090679.3</i> | rs4480613   | NR                    | 5.93 | z score increase              | $3.00 \times 10^{-9}$  | Nagel M              |
| 12  | <i>AC090679.2 - AC087888.1</i> | rs2956278   | 0.234                 | 1.04 | [NR]                          | $2.00 \times 10^{-7}$  | Li X                 |
| 12  | <i>AC090679.2 - AC087888.1</i> | rs2956287   | NR                    | 6.57 | z score decrease              | $5.00 \times 10^{-11}$ | Nagel M              |
| 12  | <i>AC087888.1 - AC093027.1</i> | rs2125716   | 0.765                 | 0.03 | [0.021–0.048] unit decrease   | $3.00 \times 10^{-8}$  | Hyde CL              |
| 12  | <i>NTS - MGAT4C</i>            | rs1448094   | NR                    | 0.10 | [0.061–0.139] unit increase   | $1.00 \times 10^{-6}$  | Hall LS              |
| 12  | <i>PLXNC1</i>                  | rs73228161  | NR                    | 0.19 | [0.11–0.27] unit increase     | $6.00 \times 10^{-6}$  | Hall LS              |
| 12  | <i>SUDS3</i>                   | rs521048    | 0.731                 | 0.01 | [0.0042–0.0092] unit increase | $5.00 \times 10^{-7}$  | Howard DM            |
| 12  | <i>SPPL3</i>                   | rs3213572   | 0.475                 | 1.02 | [1.016–1.024]                 | $6.00 \times 10^{-20}$ | Howard DM            |
| 12  | <i>SPPL3</i>                   | rs3897746   | 0.483                 | 0.03 | [0.017–0.041] unit increase   | $2.00 \times 10^{-7}$  | Hyde CL              |
| 12  | <i>SPPL3</i>                   | rs1151849   | NR                    | 5.60 | z score decrease              | $2.00 \times 10^{-8}$  | Nagel M              |



| Chr | Gene                           | SNP         | Risk Allele Frequency | Beta | 95% CI                        | P                      | First Author         |
|-----|--------------------------------|-------------|-----------------------|------|-------------------------------|------------------------|----------------------|
| 12  | <i>RPL12P33 - HNF1A-AS1</i>    | rs77741769  | NR                    | 5.78 | z score increase              | $8.00 \times 10^{-9}$  | Nagel M              |
| 12  | <i>ORAI1</i>                   | rs782472239 | NR                    |      |                               | $9.00 \times 10^{-7}$  | Wong ML              |
| 12  | <i>LINC02824</i>               | rs1706497   | NR                    | 5.54 | z score increase              | $3.00 \times 10^{-8}$  | Nagel M              |
| 12  | <i>LINC02375</i>               | rs10744304  | 0.630                 | 0.15 | [NR] unit decrease            | $9.00 \times 10^{-6}$  | Terracciano A        |
| 13  | <i>B3GLCT</i>                  | rs9530139   | 0.196                 | 0.01 | [0.006–0.0118] unit decrease  | $3.00 \times 10^{-9}$  | Howard DM            |
| 13  | <i>B3GLCT - AL161616.2</i>     | rs1409379   | 0.764                 | 1.02 | [1.012–1.022]                 | $8.00 \times 10^{-11}$ | Howard DM            |
| 13  | <i>ENOX1</i>                   | rs17538444  | 0.070                 | 0.39 | [0.24–0.54] unit decrease     | $4.00 \times 10^{-7}$  | GENDEP Investigators |
| 13  | <i>ENOX1</i>                   | rs4143229   | 0.080                 | 1.05 | [1.03–1.07]                   | $3.00 \times 10^{-8}$  | Wray NR              |
| 13  | <i>OLFM4</i>                   | rs8181889   | NR                    | 5.49 | z score decrease              | $4.00 \times 10^{-8}$  | Nagel M              |
| 13  | <i>OLFM4</i>                   | rs12552     | 0.555                 | 0.04 | [0.032–0.055] unit decrease   | $8.00 \times 10^{-9}$  | Hyde CL              |
| 13  | <i>OLFM4</i>                   | rs12552     | NR                    | 6.37 | z score increase              | $2.00 \times 10^{-10}$ | Nagel M              |
| 13  | <i>OLFM4</i>                   | rs12552     | 0.440                 | 1.04 | [1.03–1.05]                   | $6.00 \times 10^{-19}$ | Wray NR              |
| 13  | <i>OLFM4 - LINC01065</i>       | rs1343607   | 0.375                 | 1.08 | [1.05–1.11]                   | $1.00 \times 10^{-6}$  | Coleman JRI          |
| 13  | <i>OLFM4 - LINC01065</i>       | rs1343605   | 0.384                 | 1.02 | [1.019–1.028]                 | $2.00 \times 10^{-25}$ | Howard DM            |
| 13  | <i>LINC01065</i>               | rs2806985   | NR                    | 5.63 | z score increase              | $2.00 \times 10^{-8}$  | Nagel M              |
| 13  | <i>LINC01065</i>               | rs1322944   | NR                    | 5.98 | z score increase              | $2.00 \times 10^{-9}$  | Nagel M              |
| 13  | <i>AL356295.1, AL450423.2</i>  | rs1867368   | 0.317                 | 1.03 | [NR]                          | $5.00 \times 10^{-8}$  | Li X                 |
| 13  | <i>PCDH9</i>                   | rs9540720   | 0.500                 | 0.03 | [0.019–0.042] unit increase   | $9.00 \times 10^{-7}$  | Hyde CL              |
| 13  | <i>PCDH9</i>                   | rs9592461   | NR                    | 7.06 | z score increase              | $2.00 \times 10^{-12}$ | Nagel M              |
| 13  | <i>PCDH9</i>                   | rs9592461   | 0.487                 | 1.03 | [1.02–1.029]                  | $1.00 \times 10^{-28}$ | Howard DM            |
| 13  | <i>PCDH9</i>                   | rs1413573   | 0.492                 | 1.03 | [NR]                          | $2.00 \times 10^{-8}$  | Li X                 |
| 13  | <i>PCDH9</i>                   | rs4883777   | NR                    | 5.71 | z score increase              | $1.00 \times 10^{-8}$  | Nagel M              |
| 13  | <i>PCDH9</i>                   | rs78643921  | 0.896                 | 1.08 | [1.05–1.11]                   | $1.00 \times 10^{-6}$  | Coleman JRI          |
| 13  | <i>AL512452.1</i>              | rs6562505   | NR                    | 5.47 | z score decrease              | $5.00 \times 10^{-8}$  | Nagel M              |
| 13  | <i>ATXN8OS - RNU6-54P</i>      | rs9572423   | 0.880                 | 1.54 |                               | $9.00 \times 10^{-6}$  | Shi J                |
| 13  | <i>LINC01068 - AL136442.1</i>  | rs9601248   | 0.498                 | 1.38 | [1.25–1.52]                   | $2.00 \times 10^{-6}$  | GENDEP Investigators |
| 13  | <i>AL137781.1 - SPRY2</i>      | rs9545360   | 0.819                 | 1.02 | [1.01–1.02]                   | $7.00 \times 10^{-9}$  | Howard DM            |
| 13  | <i>AL137781.1 - SPRY2</i>      | rs1755255   | 0.712                 | 0.01 | [0.0039–0.0089] unit increase | $8.00 \times 10^{-7}$  | Howard DM            |
| 13  | <i>AL590807.1</i>              | rs11149178  | 0.356                 | 0.18 | [0.1–0.26] unit decrease      | $7.00 \times 10^{-6}$  | GENDEP Investigators |
| 13  | <i>LINC00430 - UBBP5</i>       | rs139073054 | NR                    | 0.35 | [0.21–0.49] unit increase     | $2.00 \times 10^{-6}$  | Hall LS              |
| 13  | <i>LINC00410</i>               | rs1031396   | NR                    | 0.40 | [0.22–0.58] unit decrease     | $5.00 \times 10^{-6}$  | Hall LS              |
| 13  | <i>STK24</i>                   | rs4772087   | 0.373                 | 1.02 | [1.017–1.026]                 | $2.00 \times 10^{-20}$ | Howard DM            |
| 13  | <i>NALCN</i>                   | rs9300648   | NR                    | 0.16 | [0.1–0.22] unit decrease      | $6.00 \times 10^{-6}$  | Hall LS              |
| 13  | <i>AL354741.1 - FAM155A</i>    | rs1927745   | 0.240                 | 0.16 | [NR] unit decrease            | $5.00 \times 10^{-6}$  | Terracciano A        |
| 13  | <i>RPL21P107 - LINC00567</i>   | rs4438172   | 0.250                 | 0.11 | [0.071–0.149] unit increase   | $9.00 \times 10^{-7}$  | Hall LS              |
| 13  | <i>RASA3</i>                   | rs67917624  | 0.027                 | 1.16 | [1.1–1.22]                    | $1.00 \times 10^{-6}$  | Coleman JRI          |
| 14  | <i>EGLN3</i>                   | rs60225398  | 0.761                 | 1.08 | [1.04–1.11]                   | $2.00 \times 10^{-6}$  | Coleman JRI          |
| 14  | <i>AL121821.2 - LRFN5</i>      | rs61990288  | 0.492                 | 1.03 | [1.02–1.03]                   | $2.00 \times 10^{-31}$ | Howard DM            |
| 14  | <i>LRFN5</i>                   | rs1900599   | 0.278                 | 0.01 | [0.004–0.009] unit increase   | $6.00 \times 10^{-7}$  | Howard DM            |
| 14  | <i>LRFN5</i>                   | rs4904738   | 0.430                 | 1.03 | [1.02–1.04]                   | $3.00 \times 10^{-9}$  | Wray NR              |
| 14  | <i>TBPL2</i>                   | rs72717793  | 0.228                 | 1.14 | [1.08–1.19]                   | $6.00 \times 10^{-6}$  | Coleman JRI          |
| 14  | <i>DAAMI</i>                   | rs1957408   | 0.491                 | 1.15 | [1.09–1.21]                   | $2.00 \times 10^{-6}$  | Coleman JRI          |
| 14  | <i>RTN1</i>                    | rs1956373   | 0.256                 | 1.02 | [1.01–1.02]                   | $6.00 \times 10^{-12}$ | Howard DM            |
| 14  | <i>KCNH5</i>                   | rs8012941   | 0.498                 | 1.54 | [1.35–1.72]                   | $4.00 \times 10^{-6}$  | GENDEP Investigators |
| 14  | <i>ESR2, SYNE2</i>             | rs915057    | 0.580                 | 1.03 | [1.02–1.04]                   | $8.00 \times 10^{-10}$ | Wray NR              |
| 14  | <i>ESR2</i>                    | rs1152578   | 0.564                 | 1.02 | [1.01–1.02]                   | $4.00 \times 10^{-12}$ | Howard DM            |
| 14  | <i>GPHN</i>                    | rs8020095   | 0.170                 |      |                               | $3.00 \times 10^{-6}$  | Hek K                |
| 14  | <i>PLEK2</i>                   | rs9323497   | 0.050                 |      |                               | $4.00 \times 10^{-9}$  | Amare AT             |
| 14  | <i>AREL1</i>                   | rs1045430   | 0.521                 | 1.02 | [1.02–1.03]                   | $4.00 \times 10^{-25}$ | Howard DM            |
| 14  | <i>YLPM1</i>                   | rs12889665  | 0.538                 | 1.03 | [1.02–1.04]                   | $3.00 \times 10^{-8}$  | Cai N                |
| 14  | <i>YLPM1</i>                   | rs10148293  | 0.539                 | 0.01 | [0.0038–0.0086] unit increase | $1.00 \times 10^{-7}$  | Howard DM            |
| 14  | <i>ADCK1 - FXNP1</i>           | rs4903685   | 0.275                 | 1.07 | [1.04–1.1]                    | $8.00 \times 10^{-6}$  | Coleman JRI          |
| 14  | <i>AL356807.1</i>              | rs144213213 | 0.981                 | 1.09 | [1.05–1.12]                   | $2.00 \times 10^{-7}$  | Coleman JRI          |
| 14  | <i>AL163642.2 - AL357172.1</i> | rs79306025  | NR                    | 0.44 | [0.26–0.62] unit increase     | $2.00 \times 10^{-6}$  | Hall LS              |
| 14  | <i>PRIMA1, PRIMA1</i>          | rs8008104   | 0.095                 | 1.07 | [1.04–1.1]                    | $6.00 \times 10^{-6}$  | Coleman JRI          |
| 14  | <i>LINC02304</i>               | rs60716536  | NR                    | 0.13 | [0.071–0.189] unit decrease   | $3.00 \times 10^{-6}$  | Hall LS              |
| 14  | <i>CDC42BPB</i>                | rs117911063 | 0.031                 | 0.02 | [0.012–0.026] unit increase   | $4.00 \times 10^{-7}$  | Howard DM            |
| 14  | <i>RNU7-160P - AL139300.2</i>  | rs10149470  | 0.513                 | 1.02 | [1.02–1.02]                   | $7.00 \times 10^{-22}$ | Howard DM            |
| 14  | <i>RNU7-160P - AL139300.2</i>  | rs10149470  | 0.510                 | 1.03 | [1.02–1.04]                   | $3.00 \times 10^{-9}$  | Wray NR              |
| 14  | <i>KLC1, AL139300.1</i>        | rs4906349   | 0.311                 | 0.01 | [0.0039–0.0089] unit decrease | $5.00 \times 10^{-7}$  | Howard DM            |
| 14  | <i>TDRD9</i>                   | rs61997596  | 0.191                 | 1.04 | [1.02–1.05]                   | $4.00 \times 10^{-8}$  | Cai N                |
| 15  | <i>AC087490.1 - PWRN4</i>      | rs1380551   | 0.150                 | 0.18 | [0.1–0.26] unit decrease      | $4.00 \times 10^{-7}$  | Hall LS              |
| 15  | <i>FMN1 - TMC05B</i>           | rs974379    | 0.075                 | 1.29 | [1.17–1.4]                    | $8.00 \times 10^{-6}$  | GENDEP Investigators |
| 15  | <i>AC021351.1, LINC02853</i>   | rs10520045  | 0.270                 | 1.32 | [1.17–1.50]                   | $7.00 \times 10^{-6}$  | Rietschel M          |
| 15  | <i>AC087516.2 - COX6CP4</i>    | rs17705482  | NR                    | 0.11 | [0.051–0.169] unit decrease   | $9.00 \times 10^{-6}$  | Hall LS              |
| 15  | <i>AC087283.1 - AC068875.1</i> | rs8037355   | 0.444                 | 1.02 | [1.02–1.02]                   | $2.00 \times 10^{-18}$ | Howard DM            |
| 15  | <i>AC087283.1 - AC068875.1</i> | rs8025231   | 0.428                 | 0.04 | [0.024–0.047] unit increase   | $1.00 \times 10^{-8}$  | Hyde CL              |
| 15  | <i>AC087283.1 - AC068875.1</i> | rs8025231   | 0.430                 | 1.03 | [1.02–1.04]                   | $2.00 \times 10^{-12}$ | Wray NR              |

| Chr | Gene                                    | SNP         | Risk Allele Frequency | Beta | 95% CI                        | P                      | First Author         |
|-----|-----------------------------------------|-------------|-----------------------|------|-------------------------------|------------------------|----------------------|
| 15  | <i>AC068875.1</i>                       | rs1457257   | 0.366                 | 1.04 | [NR]                          | $1.00 \times 10^{-8}$  | Li X                 |
| 15  | <i>SEMA6D, AC023905.1</i>               | rs34488670  | 0.211                 | 1.02 | [1.01–1.02]                   | $5.00 \times 10^{-13}$ | Howard DM            |
| 15  | <i>SEMA6D</i>                           | rs117319730 | NR                    | 5.54 | z score decrease              | $3.00 \times 10^{-8}$  | Nagel M              |
| 15  | <i>SEMA6D</i>                           | rs72733826  | NR                    | 5.91 | z score increase              | $3.00 \times 10^{-9}$  | Nagel M              |
| 15  | <i>SHC4</i>                             | rs8023445   |                       |      |                               | $2.00 \times 10^{-6}$  | Aragam N             |
| 15  | <i>SHC4, AC091073.2</i>                 | rs11070668  | NR                    | 1.41 | [1.22–1.61]                   | $4.00 \times 10^{-6}$  | Howard DM            |
| 15  | <i>MIR4713HG, TNFAIP8L3</i>             | rs150406602 | 0.029                 | 1.14 | [1.09–1.2]                    | $1.00 \times 10^{-6}$  | Coleman JRI          |
| 15  | <i>LYSMD2</i>                           | rs2414116   | 0.462                 | 1.07 | [1.04–1.1]                    | $3.00 \times 10^{-6}$  | Coleman JRI          |
| 15  | <i>RORA</i>                             | rs12912233  | 0.460                 | 0.15 | [NR] unit increase            | $6.00 \times 10^{-7}$  | Terracciano A        |
| 15  | <i>ITGA11</i>                           | rs7174755   | 0.369                 | 0.20 | [0.13–0.28] unit decrease     | $3.00 \times 10^{-7}$  | GENDEP Investigators |
| 15  | <i>ITGA11</i>                           | rs7174755   | 0.630                 | 1.17 | [1.11–1.23]                   | $9.00 \times 10^{-7}$  | GENDEP Investigators |
| 15  | <i>LINGO1</i>                           | rs7170398   | NR                    | 5.62 | z score increase              | $2.00 \times 10^{-8}$  | Nagel M              |
| 15  | <i>AC105133.1, LINGO1</i>               | rs11629621  | NR                    | 5.48 | z score decrease              | $4.00 \times 10^{-8}$  | Nagel M              |
| 15  | <i>NTRK3-AS1 - MRPL46</i>               | rs28541419  | 0.231                 | 0.01 | [0.0051–0.0105] unit decrease | $3.00 \times 10^{-8}$  | Howard DM            |
| 15  | <i>AC024651.3 - ARRDC4</i>              | rs74031748  | NR                    | 0.19 | [0.11–0.27] unit decrease     | $7.00 \times 10^{-6}$  | Hall LS              |
| 15  | <i>LYSMD4 - DNM1P46</i>                 | rs6598266   | 0.143                 | 0.25 | [0.15–0.36] unit increase     | $3.00 \times 10^{-6}$  | GENDEP Investigators |
| 16  | <i>TSC2</i>                             | rs8050755   | NR                    | 0.11 | [0.071–0.149] unit increase   | $9.00 \times 10^{-6}$  | Hall LS              |
| 16  | <i>AC009065.6, PKD1</i>                 | rs74002781  | NR                    | 0.21 | [0.11–0.31] unit decrease     | $7.00 \times 10^{-6}$  | Hall LS              |
| 16  | <i>RBFOX1, AC009135.1</i>               | rs1811320   | 0.582                 | 1.08 | [1.05–1.11]                   | $1.00 \times 10^{-6}$  | Coleman JRI          |
| 16  | <i>RBFOX1</i>                           | rs8063603   | 0.350                 | 1.03 | [1.02–1.04]                   | $7.00 \times 10^{-9}$  | Wray NR              |
| 16  | <i>RBFOX1</i>                           | rs7193263   | NR                    | 6.48 | z score decrease              | $9.00 \times 10^{-11}$ | Nagel M              |
| 16  | <i>RBFOX1</i>                           | rs7193263   | 0.332                 | 1.02 | [1.02–1.03]                   | $4.00 \times 10^{-19}$ | Howard DM            |
| 16  | <i>RBFOX1</i>                           | rs7198928   | 0.616                 | 1.02 | [1.018–1.027]                 | $4.00 \times 10^{-23}$ | Howard DM            |
| 16  | <i>RBFOX1</i>                           | rs7198928   | 0.620                 | 1.03 | [1.02–1.04]                   | $1.00 \times 10^{-8}$  | Wray NR              |
| 16  | <i>RBFOX1</i>                           | rs3785236   | 0.755                 | 0.04 | [0.023–0.05] unit increase    | $9.00 \times 10^{-7}$  | Hyde CL              |
| 16  | <i>RBFOX1</i>                           | rs3785234   | 0.624                 | 1.04 | [NR]                          | $2.00 \times 10^{-8}$  | Li X                 |
| 16  | <i>RBFOX1</i>                           | rs2191130   | NR                    | 6.10 | z score increase              | $1.00 \times 10^{-9}$  | Nagel M              |
| 16  | <i>SNX29</i>                            | rs830716    | 0.714                 | 0.01 | [0.0041–0.0091] unit increase | $5.00 \times 10^{-7}$  | Howard DM            |
| 16  | <i>SHISA9</i>                           | rs7200826   | 0.255                 | 1.03 | [1.022–1.032]                 | $3.00 \times 10^{-28}$ | Howard DM            |
| 16  | <i>SHISA9</i>                           | rs7200826   | 0.250                 | 1.03 | [1.02–1.04]                   | $2.00 \times 10^{-8}$  | Wray NR              |
| 16  | <i>U91319.1 - U95743.1</i>              | rs56887639  | 0.274                 | 1.02 | [1.01–1.02]                   | $6.00 \times 10^{-13}$ | Howard DM            |
| 16  | <i>U91319.1 - U95743.1</i>              | rs12932870  | 0.187                 | 0.01 | [0.0053–0.0111] unit increase | $7.00 \times 10^{-8}$  | Howard DM            |
| 16  | <i>METTL9, METTL9</i>                   | rs11646401  | 0.442                 | 1.03 | [1.02–1.04]                   | $4.00 \times 10^{-8}$  | Cai N                |
| 16  | <i>METTL9, METTL9</i>                   | rs1478461   | 0.662                 | 0.01 | [0.0042–0.009] unit increase  | $1.00 \times 10^{-7}$  | Howard DM            |
| 16  | <i>METTL9, METTL9</i>                   | rs12923444  | 0.438                 | 1.02 | [1.02–1.03]                   | $2.00 \times 10^{-24}$ | Howard DM            |
| 16  | <i>AC127459.2 - AC127459.1</i>          | rs6497642   | 0.679                 | 1.15 | [1.09–1.21]                   | $4.00 \times 10^{-6}$  | Coleman JRI          |
| 16  | <i>AC007861.1</i>                       | rs35888008  | NR                    | 0.09 | [0.051–0.129] unit increase   | $4.00 \times 10^{-6}$  | Hall LS              |
| 16  | <i>AC007861.1</i>                       | rs35888008  | NR                    | 0.12 | [0.061–0.179] unit increase   | $6.00 \times 10^{-6}$  | Hall LS              |
| 16  | <i>LINC01571 - C16orf97</i>             | rs1486437   | NR                    | 0.13 | [0.071–0.189] unit decrease   | $9.00 \times 10^{-6}$  | Hall LS              |
| 16  | <i>CASC22, AC007333.1</i>               | rs10521261  | 0.801                 | 0.03 | [0.018–0.05] unit increase    | $3.00 \times 10^{-7}$  | Hyde CL              |
| 16  | <i>LINC02141 - AC009081.2</i>           | rs117225626 | 0.015                 | 1.15 | [1.09–1.2]                    | $5.00 \times 10^{-7}$  | Coleman JRI          |
| 16  | <i>PMFBP1 - AC009075.1</i>              | rs11643192  | 0.410                 | 1.03 | [1.02–1.04]                   | $3.00 \times 10^{-8}$  | Wray NR              |
| 16  | <i>ZFX3, LINC01568</i>                  | rs12446956  | 0.130                 | 1.22 | [NR]                          | $1.00 \times 10^{-6}$  | Wray NR              |
| 16  | <i>AC106733.1 - MON1B</i>               | rs2342343   | 0.306                 | 1.07 | [1.04–1.1]                    | $6.00 \times 10^{-6}$  | Coleman JRI          |
| 16  | <i>CDH13</i>                            | rs10514585  | 0.310                 | 0.15 | [NR] unit increase            | $5.00 \times 10^{-6}$  | Terracciano A        |
| 16  | <i>AC092723.2 - AC135012.1</i>          | rs8050326   | 0.440                 | 1.45 | [1.26–1.76]                   | $3.00 \times 10^{-7}$  | Power RA             |
| 16  | <i>ZCCHC14</i>                          | rs9646303   | NR                    |      |                               | $5.00 \times 10^{-6}$  | Sullivan PF          |
| 17  | <i>AC005291.2, MYH13</i>                | rs3744550   | NR                    |      |                               | $4.00 \times 10^{-6}$  | Wong ML              |
| 17  | <i>AC015908.7 - RN7SL601P</i>           | rs117183159 | 0.949                 | 1.07 | [1.04–1.1]                    | $9.00 \times 10^{-6}$  | Coleman JRI          |
| 17  | <i>PIPOX</i>                            | rs75581564  | 0.117                 | 1.03 | [1.018–1.032]                 | $3.00 \times 10^{-13}$ | Howard DM            |
| 17  | <i>PIPOX</i>                            | rs8066520   | 0.850                 | 0.04 | [0.022–0.054] unit decrease   | $4.00 \times 10^{-6}$  | Hyde CL              |
| 17  | <i>CRYBA1</i>                           | rs17727765  | 0.080                 | 1.05 | [1.04–1.07]                   | $9.00 \times 10^{-9}$  | Wray NR              |
| 17  | <i>ASIC2</i>                            | rs34187563  | 0.405                 | 0.01 | [0.004–0.0088] unit decrease  | $3.00 \times 10^{-7}$  | Howard DM            |
| 17  | <i>AC015911.11</i>                      | rs8070473   | 0.320                 | 0.16 | [NR] unit decrease            | $2.00 \times 10^{-6}$  | Terracciano A        |
| 17  | <i>KRTAP4-17P - KRTAP9-1</i>            | rs56294834  | 0.021                 | 1.13 | [1.07–1.18]                   | $8.00 \times 10^{-6}$  | Coleman JRI          |
| 17  | <i>AC100793.3, CNTNAP1</i>              | rs142029931 | NR                    |      |                               | $1.00 \times 10^{-6}$  | Wong ML              |
| 17  | <i>SUPT4H1, TSPOAP1-AS1, AC004687.2</i> | rs7222143   | 0.445                 | 1.07 | [1.04–1.1]                    | $7.00 \times 10^{-6}$  | Coleman JRI          |
| 17  | <i>WIP1, AC007780.1</i>                 | rs12943181  | 0.280                 | 0.01 | [0.0046–0.0096] unit decrease | $6.00 \times 10^{-8}$  | Howard DM            |
| 17  | <i>UNC13D</i>                           | rs150952348 | NR                    |      |                               | $7.00 \times 10^{-7}$  | Wong ML              |
| 17  | <i>RNF213</i>                           | rs35864932  | 0.475                 | 1.07 | [1.04–1.1]                    | $4.00 \times 10^{-6}$  | Coleman JRI          |
| 17  | <i>BAIAP2</i>                           | rs55748329  | NR                    | 6.10 | z score increase              | $1.00 \times 10^{-9}$  | Nagel M              |
| 17  | <i>FASN</i>                             | rs200897153 | NR                    |      |                               | $2.00 \times 10^{-6}$  | Wong ML              |
| 18  | <i>AP005230.1</i>                       | rs56039004  | 0.070                 | 1.15 | [1.09–1.2]                    | $8.00 \times 10^{-7}$  | Coleman JRI          |
| 18  | <i>AP005061.1 - RNU6-340P</i>           | rs9964540   | 0.009                 | 1.08 | [1.04–1.11]                   | $3.00 \times 10^{-6}$  | Coleman JRI          |
| 18  | <i>PIEZO2</i>                           | rs264272    | 0.520                 | 1.14 | [1.09–1.2]                    | $4.00 \times 10^{-6}$  | GENDEP Investigators |
| 18  | <i>PIEZO2</i>                           | rs264272    | 0.487                 | 0.17 | [0.099–0.243] unit decrease   | $3.00 \times 10^{-6}$  | GENDEP Investigators |
| 18  | <i>AC115100.1 - AC090506.1</i>          | rs972697    | 0.206                 | 1.07 | [1.04–1.1]                    | $8.00 \times 10^{-6}$  | Coleman JRI          |
| 18  | <i>ASXL3 - NOLA</i>                     | rs10460050  | 0.421                 | 1.07 | [1.04–1.1]                    | $9.00 \times 10^{-6}$  | Coleman JRI          |

| Chr | Gene                                  | SNP         | Risk Allele Frequency | Beta | 95% CI                        | P                      | First Author         |
|-----|---------------------------------------|-------------|-----------------------|------|-------------------------------|------------------------|----------------------|
| 18  | <i>CELF4</i>                          | rs4799936   | NR                    | 5.64 | z score decrease              | $2.00 \times 10^{-8}$  | Nagel M              |
| 18  | <i>CELF4</i>                          | rs11877758  | 0.311                 | 0.01 | [0.0042–0.0092] unit increase | $1.00 \times 10^{-7}$  | Howard DM            |
| 18  | <i>CELF4</i>                          | rs12967855  | 0.329                 | 1.03 | [1.02–1.05]                   | $2.00 \times 10^{-9}$  | Cai N                |
| 18  | <i>CELF4</i>                          | rs12967855  | 0.330                 | 1.02 | [1.016–1.026]                 | $1.00 \times 10^{-19}$ | Howard DM            |
| 18  | <i>AC009899.1</i>                     | rs11665070  | NR                    | 6.04 | z score decrease              | $2.00 \times 10^{-9}$  | Nagel M              |
| 18  | <i>AC009899.1</i>                     | rs1427027   | NR                    | 5.63 | z score increase              | $2.00 \times 10^{-8}$  | Nagel M              |
| 18  | <i>RNU6-706P - MIR924HG</i>           | rs57679688  | 0.263                 | 0.01 | [0.0044–0.0094] unit increase | $3.00 \times 10^{-7}$  | Howard DM            |
| 18  | <i>MIR924HG</i>                       | rs62099069  | 0.580                 | 1.03 | [1.02–1.04]                   | $1.00 \times 10^{-8}$  | Wray NR              |
| 18  | <i>MIR924HG</i>                       | rs2163544   | 0.420                 | 0.03 | [0.019–0.043] unit decrease   | $2.00 \times 10^{-6}$  | Hyde CL              |
| 18  | <i>SYT4 - AC022743.1</i>              | rs12457996  | 0.770                 | 1.15 | [NR]                          | $6.00 \times 10^{-6}$  | Wray NR              |
| 18  | <i>DCC</i>                            | rs149735550 | NR                    | 5.53 | z score increase              | $3.00 \times 10^{-8}$  | Nagel M              |
| 18  | <i>DCC</i>                            | rs62097899  | NR                    | 6.15 | z score increase              | $8.00 \times 10^{-10}$ | Nagel M              |
| 18  | <i>DCC</i>                            | rs11663393  | 0.450                 | 1.03 | [1.02–1.04]                   | $2.00 \times 10^{-8}$  | Wray NR              |
| 18  | <i>DCC</i>                            | rs4277413   | NR                    | 6.77 | z score decrease              | $1.00 \times 10^{-11}$ | Nagel M              |
| 18  | <i>DCC</i>                            | rs7505145   | NR                    | 5.62 | z score decrease              | $2.00 \times 10^{-8}$  | Nagel M              |
| 18  | <i>DCC</i>                            | rs7227069   | 0.433                 | 1.02 | [1.02–1.029]                  | $2.00 \times 10^{-28}$ | Howard DM            |
| 18  | <i>DCC</i>                            | rs12968428  | NR                    | 7.07 | z score increase              | $2.00 \times 10^{-12}$ | Nagel M              |
| 18  | <i>DCC</i>                            | rs8099160   | NR                    | 7.64 | z score increase              | $2.00 \times 10^{-14}$ | Nagel M              |
| 18  | <i>DCC</i>                            | rs17410557  | 0.391                 | 0.01 | [0.0035–0.0083] unit increase | $8.00 \times 10^{-7}$  | Howard DM            |
| 18  | <i>DCC</i>                            | rs1431181   | NR                    | 6.96 | z score increase              | $3.00 \times 10^{-12}$ | Nagel M              |
| 18  | <i>DCC</i>                            | rs8089865   | NR                    | 6.62 | z score increase              | $3.00 \times 10^{-11}$ | Nagel M              |
| 18  | <i>RAB27B</i>                         | rs62091461  | 0.773                 | 1.02 | [1.02–1.03]                   | $2.00 \times 10^{-14}$ | Howard DM            |
| 18  | <i>RAB27B</i>                         | rs1833288   | 0.720                 | 1.03 | [1.02–1.04]                   | $3.00 \times 10^{-8}$  | Wray NR              |
| 18  | <i>CCDC68 - LINC01929</i>             | rs12966052  | 0.820                 | 1.02 | [1.01–1.02]                   | $4.00 \times 10^{-11}$ | Howard DM            |
| 18  | <i>CCDC68 - LINC01929</i>             | rs12963231  | NR                    | 5.53 | z score increase              | $3.00 \times 10^{-8}$  | Nagel M              |
| 18  | <i>RNA5SP459 - TCF4</i>               | rs4801146   | 0.492                 | 0.01 | [0.0039–0.0087] unit increase | $1.00 \times 10^{-7}$  | Howard DM            |
| 18  | <i>TCF4</i>                           | rs1261070   | NR                    | 5.70 | z score decrease              | $1.00 \times 10^{-8}$  | Nagel M              |
| 18  | <i>TCF4</i>                           | rs12967143  | 0.702                 | 0.01 | [0.0045–0.0095] unit decrease | $6.00 \times 10^{-8}$  | Howard DM            |
| 18  | <i>TCF4</i>                           | rs12967143  | 0.302                 | 1.03 | [1.02–1.03]                   | $2.00 \times 10^{-27}$ | Howard DM            |
| 18  | <i>TCF4</i>                           | rs12958048  | 0.330                 | 1.03 | [1.02–1.04]                   | $4.00 \times 10^{-11}$ | Wray NR              |
| 18  | <i>TCF4</i>                           | rs1452788   | NR                    | 5.45 | z score decrease              | $5.00 \times 10^{-8}$  | Nagel M              |
| 18  | <i>TCF4</i>                           | rs4801157   | NR                    | 5.50 | z score increase              | $4.00 \times 10^{-8}$  | Nagel M              |
| 18  | <i>TCF4</i>                           | rs1452787   | 0.274                 | 0.01 | [0.0043–0.0093] unit increase | $2.00 \times 10^{-7}$  | Howard DM            |
| 18  | <i>AC022031.2</i>                     | rs8097498   | 0.387                 | 1.03 | [1.02–1.04]                   | $1.00 \times 10^{-8}$  | Cai N                |
| 18  | <i>AC006305.2</i>                     | rs1792737   | NR                    | 0.10 | [0.061–0.139] unit decrease   | $2.00 \times 10^{-6}$  | Hall LS              |
| 18  | <i>CCBE1</i>                          | rs11152166  | 0.580                 | 1.41 | [1.22–1.61]                   | $3.00 \times 10^{-6}$  | Power RA             |
| 18  | <i>LINC01544 - RNF152</i>             | rs4941058   | NR                    | 0.13 | [0.071–0.189] unit decrease   | $1.00 \times 10^{-6}$  | Hall LS              |
| 18  | <i>SERPINB13</i>                      | rs6567380   | 0.023                 | 1.14 | [1.08–1.19]                   | $2.00 \times 10^{-6}$  | Coleman JRI          |
| 18  | <i>AC114689.3</i>                     | rs17077540  | 0.110                 | 1.61 |                               | $2.00 \times 10^{-7}$  | Shi J                |
| 18  | <i>AC021594.2 - KCNG2</i>             | rs7241572   | 0.201                 | 1.02 | [1.015–1.026]                 | $3.00 \times 10^{-13}$ | Howard DM            |
| 19  | <i>CATSPERD</i>                       | rs79696139  | 0.051                 | 1.07 | [1.04–1.1]                    | $9.00 \times 10^{-6}$  | Coleman JRI          |
| 19  | <i>MARCHF2</i>                        | rs117621296 | NR                    | 0.31 | [0.17–0.45] unit decrease     | $9.00 \times 10^{-6}$  | Hall LS              |
| 19  | <i>ADGRE2</i>                         | rs112610420 | NR                    |      |                               | $1.00 \times 10^{-6}$  | Wong ML              |
| 19  | <i>ANO8</i>                           | rs143696449 | NR                    |      |                               | $5.00 \times 10^{-7}$  | Wong ML              |
| 19  | <i>ZNF536</i>                         | rs33431     | 0.614                 | 1.01 | [1.008–1.016]                 | $5.00 \times 10^{-8}$  | Howard DM            |
| 19  | <i>ZNF536</i>                         | rs33435     | 0.413                 | 0.03 | [0.015–0.039] unit decrease   | $2.00 \times 10^{-6}$  | Hyde CL              |
| 19  | <i>ANKRD27</i>                        | rs17692896  | 0.074                 | 0.44 | [0.27–0.61] unit decrease     | $7.00 \times 10^{-7}$  | GENDEP Investigators |
| 19  | <i>KCTD15 - AC008556.1</i>            | rs2546057   | 0.520                 | 1.18 | [1.12–1.24]                   | $3.00 \times 10^{-7}$  | GENDEP Investigators |
| 19  | <i>KCTD15 - AC008556.1</i>            | rs398426    | 0.259                 | 0.25 | [0.14–0.36] unit decrease     | $5.00 \times 10^{-6}$  | GENDEP Investigators |
| 19  | <i>LILRA1, LILRA1, LILRA1, LILRA1</i> | rs201483250 | NR                    |      |                               | $1.00 \times 10^{-6}$  | Wong ML              |
| 19  | <i>TMEM150B</i>                       | rs201935337 | NR                    |      |                               | $5.00 \times 10^{-11}$ | Wong ML              |
| 19  | <i>NLRP9 - RFPL4A</i>                 | rs17634917  | 0.940                 | 1.37 | [1.23–1.51]                   | $3.00 \times 10^{-6}$  | GENDEP Investigators |
| 19  | <i>NLRP9 - RFPL4A</i>                 | rs17634917  | 0.057                 | 0.38 | [0.21–0.54] unit decrease     | $6.00 \times 10^{-6}$  | GENDEP Investigators |
| 20  | <i>PLCG1</i>                          | rs2228246   | 0.163                 | 0.04 | [0.026–0.058] unit increase   | $3.00 \times 10^{-7}$  | Hyde CL              |
| 20  | <i>ZHX3 - ADI1P1</i>                  | rs6065333   | 0.150                 | 1.04 | [NR]                          | $9.00 \times 10^{-8}$  | Li X                 |
| 20  | <i>EMILIN3 - AL031667.1</i>           | rs143186028 | 0.178                 | 1.03 | [1.019–1.03]                  | $7.00 \times 10^{-18}$ | Howard DM            |
| 20  | <i>SLC12A5</i>                        | rs12624433  | 0.258                 | 1.02 | [1.014–1.024]                 | $2.00 \times 10^{-14}$ | Howard DM            |
| 20  | <i>NCOA5 - RPL13P2</i>                | rs6131010   | 0.740                 | 0.01 | [0.0048–0.0098] unit decrease | $7.00 \times 10^{-8}$  | Howard DM            |
| 20  | <i>STAU1</i>                          | rs6066975   | NR                    | 5.47 | z score decrease              | $4.00 \times 10^{-8}$  | Nagel M              |
| 20  | <i>AL035685.1, KCNB1</i>              | rs3787317   | NR                    | 6.12 | z score increase              | $9.00 \times 10^{-10}$ | Nagel M              |
| 20  | <i>KCNB1, AL035685.1</i>              | rs6019826   | NR                    | 5.74 | z score increase              | $9.00 \times 10^{-9}$  | Nagel M              |
| 20  | <i>KCNG1</i>                          | rs6096232   | 0.061                 | 1.14 | [1.08–1.2]                    | $5.00 \times 10^{-6}$  | Coleman JRI          |
| 20  | <i>LINC01718 - CDH4</i>               | rs143502921 | 0.181                 | 0.01 | [0.0057–0.0123] unit increase | $1.00 \times 10^{-7}$  | Howard DM            |
| 21  | <i>AP000961.1 - AP000474.2</i>        | rs2828520   | 0.310                 | 1.35 |                               | $4.00 \times 10^{-7}$  | Shi J                |
| 22  | <i>CLDN5 - LINC00895</i>              | rs8140097   | NR                    | 0.12 | [0.081–0.159] unit increase   | $2.00 \times 10^{-6}$  | Hall LS              |
| 22  | <i>RSPH14</i>                         | rs3788338   | 0.746                 | 1.08 | [1.05–1.11]                   | $3.00 \times 10^{-7}$  | Coleman JRI          |
| 22  | <i>KIAA1671</i>                       | rs5760842   | NR                    | 0.09 | [0.051–0.129] unit decrease   | $2.00 \times 10^{-6}$  | Hall LS              |
| 22  | <i>LARGE1</i>                         | rs5754682   | 0.874                 | 0.04 | [0.024–0.06] unit decrease    | $1.00 \times 10^{-6}$  | Hyde CL              |

| Chr | Gene                          | SNP         | Risk Allele Frequency | Beta | 95% CI                      | P                      | First Author         |
|-----|-------------------------------|-------------|-----------------------|------|-----------------------------|------------------------|----------------------|
| 22  | <i>LINC01643 - AL021877.1</i> | rs1034394   | 0.339                 | 0.21 | [0.12–0.3] unit increase    | $2.00 \times 10^{-6}$  | GENDEP Investigators |
| 22  | <i>RBX1 - AL080243.3</i>      | rs9611460   | NR                    | 5.60 | z score decrease            | $2.00 \times 10^{-8}$  | Nagel M              |
| 22  | <i>AL080243.2 - MIR1281</i>   | rs9623320   | 0.304                 | 1.04 | [NR]                        | $4.00 \times 10^{-8}$  | Li X                 |
| 22  | <i>AL080243.2 - MIR1281</i>   | rs5995992   | 0.285                 | 1.03 | [1.03–1.04]                 | $3.00 \times 10^{-35}$ | Howard DM            |
| 22  | <i>L3MBTL2, L3MBTL2-AS1</i>   | rs5758265   | 0.280                 | 1.03 | [1.02–1.04]                 | $8.00 \times 10^{-9}$  | Wray NR              |
| 22  | <i>L3MBTL2, L3MBTL2-AS1</i>   | rs2179744   | 0.718                 | 0.04 | [0.022–0.049] unit decrease | $6.00 \times 10^{-11}$ | Hyde CL              |
| 22  | <i>MEI1</i>                   | rs17377987  | 0.063                 | 1.15 | [1.09–1.21]                 | $3.00 \times 10^{-7}$  | Coleman JRI          |
| 22  | <i>WBP2NL, SLC25A5P1</i>      | rs34071114  | 0.046                 | 1.08 | [1.05–1.11]                 | $4.00 \times 10^{-7}$  | Coleman JRI          |
| 22  | <i>Z85994.2 - LINC01656</i>   | rs5766499   | 0.662                 | 1.14 | [1.08–1.2]                  | $8.00 \times 10^{-6}$  | Coleman JRI          |
| 22  | <i>PRR5-ARHGAP8, ARHGAP8</i>  | rs140395831 | NR                    |      |                             | $3.00 \times 10^{-10}$ | Wong ML              |
| 22  | <i>PHF21B - NUP50-DT</i>      | rs140555    | NR                    | 0.09 | [0.051–0.129] unit decrease | $2.00 \times 10^{-6}$  | Hall LS              |
| 22  | <i>TUBGCP6</i>                | rs5771109   | 0.599                 | 0.03 | [0.015–0.039] unit decrease | $7.00 \times 10^{-6}$  | Hyde CL              |
